# Supplementary material for: Role of intuitive knowledge in the diagnostic reasoning of hospital specialists: a focus group study
Source: PubMed Central journal article supplement — BMJ Open. 2019 Jan 28;9(1):e022724. doi: 10.1136/bmjopen-2018-022724 (PMC6352845; doi:10.1136/bmjopen-2018-022724), 2019-01-28
Supplement: bmjopen-2018-022724.draft_revisions.pdf [file bmjopen-2018-022724.draft_revisions.pdf]

# BMJ Open

BMJ Open is committed to open peer review. As part of this commitment we make the peer review history of every article we publish publicly available.

When an article is published we post the peer reviewers' comments and the authors' responses online. We also post the versions of the paper that were used during peer review. These are the versions that the peer review comments apply to.

The versions of the paper that follow are the versions that were submitted during the peer review process. They are not the versions of record or the final published versions. They should not be cited or distributed as the published version of this manuscript.

BMJ Open is an open access journal and the full, final, typeset and author-corrected version of record of the manuscript is available on our site with no access controls, subscription charges or pay-per-view fees (<http://bmjopen.bmj.com>).

If you have any questions on BMJ Open's open peer review process please email [info.bmjopen@bmj.com](mailto:info.bmjopen@bmj.com)

# BMJ Open

## The role of intuitive knowledge in the diagnostic reasoning of hospital specialists. A focus group study

|                               |                                                                                                                                                                                                                                                                                                                                                                                                                                                                                                |
|-------------------------------|------------------------------------------------------------------------------------------------------------------------------------------------------------------------------------------------------------------------------------------------------------------------------------------------------------------------------------------------------------------------------------------------------------------------------------------------------------------------------------------------|
| Journal:                      | <i>BMJ Open</i>                                                                                                                                                                                                                                                                                                                                                                                                                                                                                |
| Manuscript ID                 | bmjopen-2018-022724                                                                                                                                                                                                                                                                                                                                                                                                                                                                            |
| Article Type:                 | Research                                                                                                                                                                                                                                                                                                                                                                                                                                                                                       |
| Date Submitted by the Author: | 07-Mar-2018                                                                                                                                                                                                                                                                                                                                                                                                                                                                                    |
| Complete List of Authors:     | Van den Brink, Nydia; Universiteit Antwerpen Campus Drie Eiken, General Practice<br>Holbrechts, Birgit; Universiteit Antwerpen Campus Drie Eiken, General Practice<br>Brand, Paul; Isala klinieken, Princess Amalia Childrens Clinic<br>Stolper, Erik; University of Maastricht, CAPHRI School for Public Health and Primary Care; Universiteit Antwerpen Campus Drie Eiken, General Practice<br>Van Royen, Paul; Universiteit van Antwerpen, Decanaat Geneeskunde en Gezondheidswetenschappen |
| Keywords:                     | clinical reasoning, hospital specialists, decision making, MEDICAL EDUCATION & TRAINING, intuition                                                                                                                                                                                                                                                                                                                                                                                             |
|                               |                                                                                                                                                                                                                                                                                                                                                                                                                                                                                                |

SCHOLARONE™  
Manuscripts

Peer Review Only

## The role of intuitive knowledge in the diagnostic reasoning of hospital specialists

A focus group study

Nydia van den Brink, MD, trainee Child and Adolescent Psychiatry <sup>1</sup>

Birgit Holbrechts, MD, trainee Internal Medicine <sup>1</sup>

Paul Brand, Pediatrician, PhD <sup>2</sup>

Erik CF Stolper, GP, PhD <sup>1,3</sup>

Paul Van Royen, GP, PhD <sup>3</sup>

<sup>1</sup> Faculty of Medicine and Health Sciences, University of Antwerp, Belgium

<sup>2</sup> Department of Pediatrics, Isala Hospitals, Zwolle, the Netherlands

<sup>3</sup> Faculty of Health, Medicine and Life Sciences, CAPHRI School for Public Health and Primary Care, Maastricht University, the Netherlands

Correspondence to Erik Stolper, [cf.stolper@maastrichtuniversity.nl](mailto:cf.stolper@maastrichtuniversity.nl)

Maastricht University, P.O.Box 616 6200MD Maastricht, the Netherlands, tel 0031613412248

Number of references 30

Number of Tables 3

Abstract: number of words 285

Main text: number of words 2508

Key words: clinical reasoning, hospital specialists, decision making, medical education-  
cognitief/problem solving, intuition.

## Abstract

### *Background and objective*

Intuition is an important part of human decision-making and can be explained by the dual-process theory where analytical and non-analytical reasoning processes continually interact. These processes can also be identified in physicians' diagnostic reasoning. The valuable role of intuition, including gut feelings, has been shown among general practitioners and nurses, but less is known about its role among hospital specialists. This study focused on the diagnostic reasoning of hospital specialists, how they value, experience and use intuition.

### *Design and participants*

Twenty-eight hospital specialists in the Netherlands and Belgium participated in 6 focus groups. The discussions were recorded, transcribed verbatim and thematically coded. A circular and iterative analysis was applied until data-saturation was achieved.

### *Results*

Despite initial reservations regarding the term intuition, all participants agreed that intuition plays an important role in their diagnostic reasoning process. Many agreed that intuition could guide them, but were cautious not to be misguided. They were especially cautious since intuition does not have probative force, e.g. in medico-legal situations. 'On-the-job- experience' was regarded as a precondition to relying upon intuition. Some participants viewed intuition as non-rational and invalid. All participants said that intuitive hunches must be followed by

1  
2  
3 analytical reasoning. Cultural differences were not found. Both the doctor as a person and  
4  
5 his/her specialty were seen as important determinants for using intuition.  
6  
7

### 8 *Conclusions*

9

10 Hospital specialists use intuitive elements in their diagnostic reasoning, in line with general  
11  
12 human decision-making models. Nevertheless they appear to disagree more on its role and  
13  
14 value than previous research has shown among general practitioners. A better understanding of  
15  
16 how to take advantage of intuition, while avoiding pitfalls, and how to develop 'skilled'  
17  
18 intuition, may improve the quality of hospital specialists' diagnostic reasoning.  
19  
20  
21  
22  
23

### 24 **Strengths and limitations of this study**

25

- 26 • This is the first study exploring the role of intuition in hospital specialists' diagnostic  
27 reasoning.  
28
- 29 • The study was performed in two European countries.  
30
- 31 • The used qualitative approach enabled the researchers to study the views of specialists  
32 on the topic, and the meanings they attach to the concept.  
33
- 34 • It was not the aim of the researchers to gather data for the calculation of predictive  
35 values of intuitive hunches such as gut feelings.  
36  
37  
38  
39  
40  
41  
42  
43

### 44 **Funding statement**

45

46 This research received no specific grant from any funding agency in the public, commercial or  
47  
48 not-for-profit sectors.  
49  
50

### 51 **Competing interests statement**

52

53  
54 None declared.  
55  
56  
57  
58  
59  
60

## Introduction

Intuitive knowledge, i.e. automatically knowing by intuition, is considered an integral part of human decision making<sup>1</sup>. Research among European general practitioners (GPs) has shown that they recognize gut feelings, a specific form of intuition, as a familiar and valuable phenomenon in their diagnostic reasoning process<sup>2</sup>. The positive role of intuition has also been identified in the domain of nursing<sup>3-7</sup>. However, the medical literature does not provide much information about whether hospital specialists use intuitive knowledge such as gut feelings in their daily practice, and how strongly they rely on it<sup>8-14</sup>.

The existing theory on diagnostic reasoning is the dual-process theory, involving a human decision making model<sup>1,15</sup>. This theory assumes two continually interacting reasoning processes, analytical (AR) and non-analytical reasoning (NAR). AR is a deliberate and rational process which is slow and demanding. NAR is a fast, automatic and effortless process which is described as intuitive. AR and NAR use the same sources of knowledge and produce a similar amount of errors<sup>16</sup>.

The present study focused on the intuitive aspects of the diagnostic reasoning process of hospital specialists and on the way they experience, use and value intuition. We examined which benefits, pitfalls, and differences between specialities exist when using intuitive knowledge like gut feelings.

## Methods

1  
2  
3 The study used a qualitative approach exploring the views of specialists about diagnostic  
4 reasoning and intuitive knowledge, and the meanings they attach to these concepts<sup>17-20</sup>. Data  
5  
6 was collected via focus group, moderated by expert interviewers and two specifically trained  
7  
8 medical students, using a topic guide (Table 1).  
9  
10

11  
12  
13 Three focus groups were organized in the Netherlands and three in Flanders, the Dutch  
14 speaking part of Belgium, among a purposeful sample of 28 hospital specialists. The recruited  
15  
16 participants were those specialists who are the first to see a patient at a hospital (see Table 2).  
17  
18 They often make quick assessments of the seriousness of a patient's situation, in which intuitive  
19  
20 knowledge may play a recognizable role. After each focus group session, the script was adapted  
21  
22 to elicit more explanations or to address other topics in the next groups.  
23  
24

25  
26  
27 Audio recordings of all discussions were transcribed verbatim and checked. Data analysis was  
28  
29 initiated with open coding. The code books, created by the Dutch and Flemish researchers,  
30  
31 were compared and merged after consensus was reached. Based on these primary codes, a  
32  
33 common code book was developed, with the following categories: the description of intuition,  
34  
35 determining factors, speciality, medical education, gut feelings, others. These categories were  
36  
37 created to support further coding and analysis of the data. A circular and iterative process was  
38  
39 applied using cross-analysis of observed recurrent trends and codes. This circular process was  
40  
41 terminated when data saturation was achieved. The following themes emerged during the final  
42  
43 analysis: terminology, trust in intuition, the intuitive process, determining factors, differences  
44  
45 and similarities between specialties, defensive medicine, medical education, and differences  
46  
47 between the two countries. All data was analysed using the NVivo software package. The  
48  
49  
50  
51  
52  
53  
54  
55  
56  
57  
58  
59  
60

1  
2  
3 coding and analysis process was performed separately by the two first authors, at that time  
4  
5 final year medical students doing a research elective, and checked by the two last authors.  
6  
7  
8  
9

## 10 **Patient and Public Involvement statement**

11  
12  
13 There were no patients or public involved.  
14  
15

## 16 **Results**

### 17 *Terminology*

18  
19  
20 All of the participating hospital specialists recognized that intuitive knowledge was a part of  
21  
22 their diagnostic reasoning process (quote 1.1 see Table 3) but the way they phrased it varied,  
23  
24 e.g. it is something that just arises in you, or it is like fuzzy logic. They described intuition as a  
25  
26 subconscious and associative process. Several, sometimes vague, terms were used as  
27  
28 synonyms, such as feeling, intuition and gut feelings (quote 1.2). Various terms we used to  
29  
30 introduce our topic in the focus groups elicited different reactions in different countries. In  
31  
32 Belgium, the participants expressed reservations about the term 'intuition', while in the  
33  
34 Netherlands, the phrase 'non-analytical reasoning' elicited more reservations. Some hospital  
35  
36 specialists used the term pattern recognition to indicate intuition (quote 1.3).  
37  
38  
39  
40  
41  
42  
43  
44  
45  
46

### 47 *Trust in intuition*

48  
49 All participants recognized intuitive knowledge in their diagnostic reasoning process, but their  
50  
51 views on this concept varied widely. Some specialists said they relied strongly on their intuition,  
52  
53 while others were quite mistrusting (quote 2.1-2.2). Some participants said that intuition, gut  
54  
55  
56  
57  
58  
59  
60



1  
2  
3 feelings and non-analytical reasoning are only based on feelings, and therefore unreliable  
4  
5 (quote 2.3). Most of the participants, however, saw intuition as something positive, providing  
6  
7 added value to their diagnostic process (quote 2.4). Most specialists agreed that their first  
8  
9 hypothesis, based on intuition, usually did not differ much from their final diagnosis, which  
10  
11 meant that their intuition had high validity (quote 2.5). A widely discussed pitfall was that  
12  
13 intuition can be coloured by prejudice (quote 2.6). Tunnel vision and premature closure were  
14  
15 other examples of biases which could lead to missing a diagnosis. Some specialists pointed out  
16  
17 that they should also be on the alert for a false sense of reassurance by overestimating  
18  
19 themselves (quote 2.7).  
20  
21  
22  
23  
24  
25  
26  
27

### 28 *The intuitive process*

29  
30 The participants described intuition as presenting itself during the first contact with a patient,  
31  
32 e.g. by recognizing previously encountered disease patterns or getting a good or a bad feeling  
33  
34 when seeing a patient or hearing their story (quote 3.1). A sense of alarm was said to be  
35  
36 triggered by signals emerging from the patient's story or their symptoms and signs. Something  
37  
38 does not fit, was how this was expressed. The intuitive process always involves careful  
39  
40 observations (quote 3.2). One specialist described it as a multisensory experience (quote 3.3).  
41  
42 Intuitively generated working hypotheses may steer the further diagnostic process and  
43  
44 treatment (quote 3.4). Some participants stated that this type of reasoning saved a lot of  
45  
46 unnecessary investigations (quote 3.5).  
47  
48  
49  
50  
51

52 All participants said that intuition was an important tool for starting the diagnostic process, but  
53  
54 that the final diagnosis would never be solely based on it. Intuition had to be followed by  
55  
56  
57  
58  
59  
60

1  
2  
3 analytical reasoning (quote 3.6). The participants stated that diagnostic reasoning in fact meant  
4  
5 balancing between intuitive and analytical reasoning processes (quote 3.7). Solely using  
6  
7 analytical reasoning is not possible due to lack of time (quote 3.8), while solely using intuition  
8  
9 would lack substantiation (quote 3.6). The balance and interaction depended on the situation  
10  
11 or context (quote 3.9). A sense of alarm, encountering insecurities or vague symptoms, would  
12  
13 ensure that a doctor is on his/her guard and will investigate further, while a sense of  
14  
15 reassurance can lead to 'watchful waiting'.  
16  
17  
18  
19  
20  
21  
22

### 23 *Determining factors*

24  
25 Medical knowledge and experience were often mentioned together as the basis for developing  
26  
27 intuition (quote 4.1). The participants mentioned experience as the most important  
28  
29 determining factor, more specifically 'on-the-job experience' and learning from one's own  
30  
31 mistakes. The less experienced a physician is, the more analytical his/her approach will be.  
32  
33 Some participants indicated that younger doctors do not, and according to some should not,  
34  
35 trust their gut feelings as much, and will therefore consult a specialist-tutor for further  
36  
37 guidance (quote 4.2).  
38  
39  
40  
41  
42  
43  
44

### 45 *Differences and similarities between specialties*

46  
47 Although all participants recognized the role of intuitive knowledge in their diagnostic process,  
48  
49 doctors in the various specialities differed in the way they reached a diagnosis. The more  
50  
51 general a speciality is, such as internal medicine or emergency medicine, the greater the role of  
52  
53 intuition. In situations where timely decisions could be lifesaving, intuitive knowledge was  
54  
55  
56  
57  
58  
59  
60

1  
2  
3 regarded as a major source of judgement (quote 3.9). By contrast, some specialities, with a  
4  
5 limited set of diagnoses, did not need intuition frequently (quote 5.1). Paediatrics and  
6  
7 psychiatry are examples of a specialties in which intuition seems to play a major role because of  
8  
9 its more subjective nature (quote 5.2). According to the specialists, the use of intuition is more  
10  
11 accepted and appropriate among GPs, who see a large number of patients with very different  
12  
13 problems and often vague symptoms in a short time (quote 5.3). GPs' gut feelings were  
14  
15 generally regarded as valuable for hospital specialists. Although a specialist's domain is an  
16  
17 important determining factor of their use of intuition, their personality and empathic  
18  
19 capabilities (quote 5.4) also play a role, as appears from the finding that specialists working in  
20  
21 the same setting still differed considerably in their views on intuition.  
22  
23  
24  
25  
26  
27  
28  
29

### 30 *Defensive medicine*

31  
32 According to the participants, society will not accept decisions based purely on intuition;  
33  
34 substantiation is needed. Some participants indicated that they underpinned their intuitively  
35  
36 gained hypotheses with rational arguments as a form of protection against accusations made  
37  
38 by colleagues or charges brought by the legal authorities (quote 6.1). Evidence-Based Medicine  
39  
40 (EBM) was viewed as useful in this respect. According to some specialists, however, EBM is not  
41  
42 always applicable in daily practice, and there should be a balance between EBM and other  
43  
44 types of reasoning (quote 6.2).  
45  
46  
47  
48  
49  
50  
51

### 52 *Medical education*

1  
2  
3 Intuition as a component of medical education was a much-discussed subject. There was  
4  
5 agreement that the development of intuition cannot be taught theoretically. 'On-the-job-  
6  
7 experience' was viewed as an important factor to acquire intuitive knowledge (quote 4.1).  
8  
9  
10 Helpful approaches include making trainees aware of their gut feelings, and making them look  
11  
12 for triggering cues, as well as self-reflection, direct feedback in the workplace, and experienced  
13  
14 colleagues thinking along with them (quotes 7.1 – 7.3).  
15  
16  
17  
18  
19

### 20 *Differences between the two countries*

21  
22 A comparison of the way hospital specialists in Belgium and the Netherlands value, experience  
23  
24 and use intuition revealed no differences of importance. The only differences we noticed were  
25  
26 the reservations about the terms used and that hospital specialists from Flanders mentioned  
27  
28 medico-legal aspects more frequently (quote 6.1-6.2).  
29  
30  
31  
32  
33  
34

### 35 **Discussion**

36  
37 This focus group study has shown that intuitive reasoning processes play an important role in  
38  
39 the diagnostic reasoning of hospital specialists. Despite certain initial reservations towards the  
40  
41 term gut feelings, many participants agreed that their intuition did guide them but they were  
42  
43 careful not to be misguided. They were especially cautious since intuition does not have  
44  
45 probative force, for instance in medico-legal situations. Although opinions concerning the  
46  
47 validity of intuition varied, the majority viewed intuition as offering added value. Intuition acts  
48  
49 as a guide in the diagnostic process or as a trigger for further investigations making fast  
50  
51 decisions possible when needed and reducing unnecessary investigations. Most medical  
52  
53  
54  
55  
56  
57  
58  
59  
60

1  
2  
3 specialists used a mixture of intuitive and analytical reasoning in their diagnostic process, but  
4  
5 the balance between the two approaches was influenced by speciality and personality.  
6  
7

8 This study was conducted in two countries, in several hospitals, and involved a large variety of  
9  
10 specialities, thus providing a broad view of the perceptions and use of intuition in the Dutch  
11  
12 speaking countries. Although some focus groups only included a small number of participants,  
13  
14 this led to more in-depth conversations. As potential participants for the focus groups we  
15  
16 purposefully sampled those specialists, who have the first contact in hospital with the patient  
17  
18 implying a larger number of possible diagnoses. Future research among groups of specialists  
19  
20 who do not have the first contact with patients, could reveal how intuitive reasoning processes  
21  
22 in general play in hospital specialists.  
23  
24  
25  
26  
27  
28  
29

30 Similar results on the value and experience of intuitive knowledge have been reported in the  
31  
32 PhD thesis by the philosopher Van Droogenbroeck<sup>21</sup>. Her ethnographic study concluded that  
33  
34 most hospital specialists initially 'fly by the auto pilot' and that a large amount of 'tacit  
35  
36 knowledge' is involved in the diagnostic process. When a story triggers a sense of alarm, or  
37  
38 happens in an unusual, uncertain or complex context, doctors will switch to analytical reasoning  
39  
40 (AR). The role of experience-based knowledge is related to pattern recognition and pattern  
41  
42 failure, suggesting the relation between experience and non-analytical reasoning (NAR).  
43  
44  
45

46 Despite the involvement of a lot of tacit knowledge in the diagnostic process, hospital  
47  
48 specialists still expressed reservations about it. The fact that our results match those by Van  
49  
50 Droogenbroeck substantiates the validity and the importance of our findings.  
51  
52  
53  
54  
55  
56  
57  
58  
59  
60

1  
2  
3 Studies previously performed among GPs have yielded similar findings<sup>2</sup>. Whereas GPs mainly  
4 talk about gut feelings<sup>2</sup>, the hospital specialists used a variety of terms and seemed to have  
5 more reservations about the terms intuition, gut feelings and NAR, and also more often  
6 mentioned the possible negative consequences of intuitive reasoning processes. In general,  
7 they did agree on the determinants and triggers of intuitive reasoning processes, viz. 'on-the-  
8 job experience', personality, and recognizing a picture/or signs and symptoms that do or do not  
9 fit. While GPs stressed the important role of contextual information in the diagnostic process<sup>2</sup>,  
10 this was hardly mentioned by the hospital specialists, who emphasized experience instead. The  
11 diagnostic processes of both GPs and hospital specialists consists of an interaction between  
12 intuitive and analytical processes, as described in the dual-process theory<sup>2,15</sup>. Among GPs, a gut  
13 feeling confirms whether the GP is on the right track or warns them that taking action is  
14 necessary<sup>15</sup>. A sense of alarm triggers a GP or hospital specialist to be on his/her guard<sup>2</sup>. Most  
15 hospital specialists, however, agreed that a hypothesis based on intuition must be followed by  
16 analytical reasoning and thus substantiated by further investigations. GPs use gut feelings more  
17 as a compass, steering them through uncertain and complex situations and busy office hours<sup>2</sup>.  
18  
19  
20  
21  
22  
23  
24  
25  
26  
27  
28  
29  
30  
31  
32  
33  
34  
35  
36  
37  
38  
39  
40  
41

42 Nevertheless, there is still much controversy about the use of intuition in the medical world  
43  
44<sup>22,23</sup>, even though current insights show that everybody uses a combination of intuitive and  
45 analytical reasoning and that so-called 'skilled intuition' can be trusted<sup>24-26</sup>. In any case, young  
46 doctors can be made aware of these current insights during their training. GPs are more  
47 positive than specialists about the possibility of including intuition in medical education<sup>2</sup>.  
48  
49  
50  
51  
52  
53  
54  
55  
56  
57  
58  
59  
60

1  
2  
3 Sharing the insights gained in the present study could help optimise the development of  
4  
5 intuitive reasoning processes in the training of residents.  
6  
7

8 Self-reflection, and quick and expert feedback from experienced colleagues pertaining to  
9  
10 intuitive reasoning processes can improve the quality of their training and improve medical  
11  
12 care<sup>27</sup>. Learning to optimise the interaction between intuitive and analytical processes may be  
13  
14 the best way to prevent diagnostic errors. This approach perfectly matches the EBM concept,  
15  
16 which is all about integrating the best available evidence, the doctor's knowledge and  
17  
18 experience and the patient's preferences<sup>28</sup>. Implementing intuition in the training of residents  
19  
20 is consistent with the educational point of view arguing for the recognition of tacit knowledge  
21  
22 and corresponding theories<sup>21</sup>. Lastly, accepting intuition as an important and valuable part of  
23  
24 diagnostic reasoning can help it gain more recognition. Decisions made by Dutch medical  
25  
26 disciplinary tribunals show that intuition is viewed by these colleges as part of the professional  
27  
28 standards for doctors<sup>29</sup>, underlining the importance of gaining more recognition for intuition in  
29  
30 medico-legal contexts.  
31  
32  
33  
34  
35  
36  
37  
38  
39

40 A remarkable observation we made was that the terminology regarding intuitive processes  
41  
42 remains vague; different terms were being used as synonyms, and there were different  
43  
44 interpretations for the same words. Based on the results of similar research done among GPs<sup>30</sup>,  
45  
46 a Delphi procedure among hospital specialists could lead to a precise and valid description of  
47  
48 intuitive processes in a hospital setting. This will increase the feasibility of implementing  
49  
50 intuition in residency training and start future additional research.  
51  
52  
53  
54  
55  
56  
57  
58  
59  
60

1  
2  
3 In conclusion, intuitive knowledge plays an undeniable part in diagnostic reasoning of  
4 physicians, evidently also in hospitals settings. A better understanding of how to take  
5 advantage of intuition, while avoiding pitfalls, and how to develop 'skilled' intuition, may  
6 improve the quality of hospital specialists' diagnostic reasoning.  
7  
8  
9  
10  
11  
12  
13  
14  
15  
16  
17

18 *Acknowledgments:* Our thanks go out to all participants of the focus groups, to the moderators  
19 Ina Brouwer and Jessica Fraeyman, to medical undergraduate students Janieke Stoeten, Sofie  
20 de Groen, and Anne Schuurman.  
21  
22  
23  
24

25 *Ethical approval:* No ethical review was required for this study because no patients were  
26 involved, and the hospital specialists were only asked about their opinions and perceptions.  
27  
28  
29

### 30 *Authorship*

31 All authors contributed substantially to the study.  
32  
33  
34

- 35 • N. van den Brink: collecting of the data, analysis, drafting the manuscript, final  
36 approval.
- 37 • B. Holbrechts: collecting of the data, analysis, drafting the manuscript, final  
38 approval.
- 39 • P. Brand: collecting of the data, analysis, drafting the manuscript, final approval.
- 40 • C.F. Stolper: conducting the study design, collecting of the data, analysis, drafting the  
41 manuscript, final approval.
- 42 • P. Van Royen: conducting the study design, analysis, drafting the manuscript, final  
43 approval.
- 44 • P. Van Royen: conducting the study design, analysis, drafting the manuscript, final  
45 approval.
- 46 • C.F. Stolper: conducting the study design, collecting of the data, analysis, drafting the  
47 manuscript, final approval.
- 48 • P. Van Royen: conducting the study design, analysis, drafting the manuscript, final  
49 approval.
- 50 • P. Van Royen: conducting the study design, analysis, drafting the manuscript, final  
51 approval.
- 52 • P. Van Royen: conducting the study design, analysis, drafting the manuscript, final  
53 approval.
- 54 • P. Van Royen: conducting the study design, analysis, drafting the manuscript, final  
55 approval.
- 56 • P. Van Royen: conducting the study design, analysis, drafting the manuscript, final  
57 approval.
- 58 • P. Van Royen: conducting the study design, analysis, drafting the manuscript, final  
59 approval.
- 60 • P. Van Royen: conducting the study design, analysis, drafting the manuscript, final  
approval.



DATA SHARING STATEMENT: all data –the 6 transcripts, the code book, the results of the thematic analysis- are available for sharing via the corresponding author.

## Tables

Table 1 – Topic guide

|                                                                      |
|----------------------------------------------------------------------|
| Description of NAR, and more specifically intuition and gut feelings |
| Interaction between intuition and analytical processes               |
| Balance between intuition and analytical processes                   |
| Triggers of intuition                                                |
| Relying on intuition                                                 |
| Determining factors of intuition                                     |
| Differences between specialties                                      |

Table 2 - Participant specifications

|   | Date       | Location | Participants            |                                                                                                                                       |
|---|------------|----------|-------------------------|---------------------------------------------------------------------------------------------------------------------------------------|
| 1 | 2013-11-28 | NL       | 6<br>♂:<br>1<br>♀:<br>5 | Internal medicine, paediatrics, cardiology, neurology, emergency medicine, pulmonology                                                |
| 2 | 2014-01-29 | NL       | 8<br>♂:<br>2<br>♀:<br>6 | Cardiology, endocrinology, gastro-enterology and hepatology, general surgery, infectious diseases, neurology, paediatrics, psychiatry |
| 3 | 2014-06-23 | NL       | 3<br>♂:<br>2<br>♀:<br>1 | Dermatology, nephrology, neurology                                                                                                    |
| 4 | 2015-03-16 | BE       | 5<br>♂:<br>3<br>♀:<br>2 | Abdominal surgery, emergency medicine, neurology, neurosurgery, paediatrics                                                           |
| 5 | 2015-10-22 | BE       | 4<br>♂:<br>2<br>♀:<br>2 | Hepatobiliary, transplantation and endocrine surgery, neurosurgery, psychiatry, sexology                                              |

|   |            |    |   |                    |                    |
|---|------------|----|---|--------------------|--------------------|
| 6 | 2015-12-15 | BE | 2 | ♂:<br>2<br>♀:<br>0 | Emergency medicine |
|---|------------|----|---|--------------------|--------------------|

Table 3 Quotes

|                       | Focus group | Quote                                                                                                                                                                                                                                                             |
|-----------------------|-------------|-------------------------------------------------------------------------------------------------------------------------------------------------------------------------------------------------------------------------------------------------------------------|
| Description intuition |             |                                                                                                                                                                                                                                                                   |
| 1.1                   | NL 2        | We all have this, if we first meet a patient, those first couple of seconds that you see somebody, you get a feeling of whether the situation is serious or not, alarming or not.                                                                                 |
| 1.2                   | NL 2        | Yes, when you mention intuitive thinking I obviously immediately think about my professional domain and about gut feeling.                                                                                                                                        |
| 1.3                   | NL 3        | For me the word intuition is more...erm... something that doesn't rely on knowledge or experience, but more a sort of feeling, and to me what you're referring to, and what I mean, is not a feeling but pattern recognition.                                     |
| Relying on intuition  |             |                                                                                                                                                                                                                                                                   |
| 2.1                   | NL 1        | Well, at a certain moment you feel this is what it is, more or less, and that's a feeling I have very strongly with patients and // at the hospital I rely on my feelings... well... for about 80%.                                                               |
| 2.2                   | BE 3        | I also distrust it. I do use it, but I also distrust it, right?                                                                                                                                                                                                   |
| 2.3                   | NL 3        | Some of us in the group are very allergic to the word gut feelings. They think that as a doctor you can't use that term. But at the same time, I think that everyone knows that it does exist.                                                                    |
| 2.4                   | BE 2        | It offers a certain advantage I think. You argue more correctly if you also use that intuition.                                                                                                                                                                   |
| 2.5                   | NL 2        | Yes, I don't experience a discrepancy either between the initial gut feeling, or whatever you want to call it, and what comes out in the end.                                                                                                                     |
| 2.6                   | BE 2        | I actually agree with what you say about the initial thought being biased, that gut feeling, by what you know before the patient enters, by what you saw in C2M [electronic medical record], by what the secretary has said when introducing the patient, by what |

|                                                  |      |                                                                                                                                                                                                                                                                                                                                                                                                                                |
|--------------------------------------------------|------|--------------------------------------------------------------------------------------------------------------------------------------------------------------------------------------------------------------------------------------------------------------------------------------------------------------------------------------------------------------------------------------------------------------------------------|
|                                                  |      | you might have heard from the GP on the phone. So, you often get a biased picture.                                                                                                                                                                                                                                                                                                                                             |
| 2.7                                              | BE 2 | Then you tell yourself I can skip that clinical examination, because last time nothing came out.                                                                                                                                                                                                                                                                                                                               |
| Intuition in the process of diagnostic reasoning |      |                                                                                                                                                                                                                                                                                                                                                                                                                                |
| - Presentation of intuition                      |      |                                                                                                                                                                                                                                                                                                                                                                                                                                |
| 3.1                                              | BE 2 | Even if you just hear a story from an assistant // Then the first thing is that there is something in in your guts, something that says this is alarming or reassuring. And then you listen very critically, to the whole story... By also building up a systemic picture.                                                                                                                                                     |
| - Triggers of intuition                          |      |                                                                                                                                                                                                                                                                                                                                                                                                                                |
| 3.2                                              | BE 2 | But well, observations are always partly intuitive, aren't they? You first look at what is going on with the person in front of you. What he's saying. I think it's like that in all specialities. You don't immediately work systematically.                                                                                                                                                                                  |
| 3.3                                              | BE 1 | There's a lot more involved then. What does the patient look like? At that moment it's a kind of multisensory experience. What does the patient look like? How is his breathing, and you listen to that for a while. Yes, there's a lot more to it than listening to their story on the phone. On the phone, it's purely factual, based on a number of questions. If you can actually see the patient, it's totally different. |
| - Intuition provides guidance                    |      |                                                                                                                                                                                                                                                                                                                                                                                                                                |
| 3.4                                              | NL 2 | But the intuition helps you, gives you guidance.                                                                                                                                                                                                                                                                                                                                                                               |
| 3.5                                              | NL 1 | That's how I've spared a hundred children some complicated investigation.                                                                                                                                                                                                                                                                                                                                                      |
| - NAR is followed by AR                          |      |                                                                                                                                                                                                                                                                                                                                                                                                                                |
| 3.6                                              | BE 3 | I often find it an important tool at the start, but it's never going to be the only factor in the eventual conclusion and the eventual decision on the diagnosis and therapy for the patient.                                                                                                                                                                                                                                  |
| - Interaction and balance between NAR and AR     |      |                                                                                                                                                                                                                                                                                                                                                                                                                                |
| 3.7                                              | BE 2 | You have to find the balance between intuition and systematic approach.                                                                                                                                                                                                                                                                                                                                                        |
| 3.8                                              | BE 3 | I think it's obvious that at busy moments, simply because there's no other option, you sometimes have to rely on gut feelings. Even if it's only because you don't have time for analytical reasoning.                                                                                                                                                                                                                         |

|                                                   |      |                                                                                                                                                                                                                                                                                                                                                                                                                                                                                                                  |
|---------------------------------------------------|------|------------------------------------------------------------------------------------------------------------------------------------------------------------------------------------------------------------------------------------------------------------------------------------------------------------------------------------------------------------------------------------------------------------------------------------------------------------------------------------------------------------------|
| 3.9                                               | BE 3 | But I'm convinced that experienced emergency specialists regularly rely on their gut feelings, to make a quick first assessment of the degree of urgency. Maybe even more than in other disciplines.                                                                                                                                                                                                                                                                                                             |
| Determinants of intuition                         |      |                                                                                                                                                                                                                                                                                                                                                                                                                                                                                                                  |
| 4.1                                               | NL 2 | Because intuition is made up of experience and knowledge.                                                                                                                                                                                                                                                                                                                                                                                                                                                        |
| 4.2                                               | BE 2 | I think some doctors who are less able to rely on that experience, on that intuition, they have to fall back on systematics. And so as you gain more experience, you can let go of that to some extent.                                                                                                                                                                                                                                                                                                          |
| Differences and similarities between specialities |      |                                                                                                                                                                                                                                                                                                                                                                                                                                                                                                                  |
| 5.1                                               | NL 1 | I always think, cardiology is of course a very different discipline, because we have, I believe, something like ten illness scripts, yes and I just check them all. Could it be this, or that? And we can actually image everything, so we can often figure it out.                                                                                                                                                                                                                                              |
| 5.2                                               | BE 2 | Subjectivity plays an important part, so you automatically start to make more use use of the intuitive. ( <i>a psychiatrist</i> )                                                                                                                                                                                                                                                                                                                                                                                |
| 5.3                                               | BE 3 | No, but general practitioners also need to deal with a different form of uncertainty, and are not held to account for that, the way it happens at a hospital. GPs are able to work with uncertainties. And that's a lot more difficult for a hospital doctor.                                                                                                                                                                                                                                                    |
| 5.4                                               | BE 3 | For individual doctors, that depends on how soon they can use that experience, allowing them to skip things. And one of those indicators, for example, is empathy. So the better you're able to understand what the patient means or feels, the better of course you can assess the situation // There are people who are simply purely scientifically oriented and have no empathic ability. Those are people who are less likely to develop this kind of intuition, or they develop it in a less valuable way. |
| Defensive medicine                                |      |                                                                                                                                                                                                                                                                                                                                                                                                                                                                                                                  |
| 6.1                                               | BE 2 | That [I've made this decision based on my intuition] is not something you can say before a court, right?                                                                                                                                                                                                                                                                                                                                                                                                         |
| 6.2                                               | BE 3 | And of course in situations where you don't yet have the experience, you'll need to rely on the evidence to some extent, and after you have gained the experience, you still have to keep looking at the evidence from the literature, and maintain a balance between the two.                                                                                                                                                                                                                                   |
| Medical education                                 |      |                                                                                                                                                                                                                                                                                                                                                                                                                                                                                                                  |
| 7.1                                               | NL1  | Yes, that's exactly when you have to check, I think always, or                                                                                                                                                                                                                                                                                                                                                                                                                                                   |

|      |      |                                                                                                                                                                                                                                                                                                                                                                    |
|------|------|--------------------------------------------------------------------------------------------------------------------------------------------------------------------------------------------------------------------------------------------------------------------------------------------------------------------------------------------------------------------|
|      |      | occasionally, why do I get this feeling, right? And that's what's so good about a hospital like this, that there is a trainee doctor sitting beside you. And when you tell them it's this or that, you need to explain why you get that feeling.                                                                                                                   |
| 7.2. | BE 1 | It should encourage you to recognize that feeling that arises and then to think right, I need to do something about this, in the sense of further reflection or especially thinking why do I get this feeling with this particular patient? // In my case, that often induces me to broaden my scope or to discuss it with someone else or consult another book... |
| 7.3  | BE 2 | When trainees see patients they get feedback on their findings. I think that's very important. Also with regard to this intuitive thinking. But I think, erm, what you could also do in their training. is emphasise its value more.                                                                                                                               |

## References

1. Kahneman D. A perspective on judgment and choice: mapping bounded rationality. *The American psychologist*. 2003;58(9):697-720.
2. Stolper E, van Bokhoven M, Houben P, et al. The diagnostic role of gut feelings in general practice. A focus group study of the concept and its determinants. *BMC family practice*. 2009;10:17.
3. Chilcote DR. Intuition: A Concept Analysis. *Nursing forum*. 2017;52(1):62-67.
4. English I. Intuition as a function of the expert nurse: a critique of Benner's novice to expert model. *Journal of advanced nursing*. 1993;18(3):387-393.
5. Hassani P, Abdi A, Jalali R, Salari N. Use of intuition by critical care nurses: a phenomenological study. *Advances in medical education and practice*. 2016;7:65-71.
6. Melin-Johansson C, Palmqvist R, Ronnberg L. Clinical intuition in the nursing process and decision-making - A mixed studies review. *Journal of clinical nursing*. 2017.
7. Richards K. Intuition: A Powerful Self-Care Tool for a Life that Thrives. *Nursing economic\$*. 2015;33(5):285-287.
8. Grube M. Towards an empirically based validation of intuitive diagnostic: Rumke's 'praecox feeling' across the schizophrenia spectrum: preliminary results. *Psychopathology*. 2006;39(5):209-217.
9. Wiswell J, Tsao K, Bellolio MF, Hess EP, Cabrera D. "Sick" or "not-sick": accuracy of System 1 diagnostic reasoning for the prediction of disposition and acuity in patients presenting to an academic ED. *The American journal of emergency medicine*. 2013;31(10):1448-1452.
10. Calder LA, Forster AJ, Stiell IG, et al. Experiential and rational decision making: a survey to determine how emergency physicians make clinical decisions. *Emergency medicine journal : EMJ*. 2012;29(10):811-816.

- 1
  - 2
  - 3
  - 4
  - 5
  - 6
  - 7
  - 8
  - 9
  - 10
  - 11
  - 12
  - 13
  - 14
  - 15
  - 16
  - 17
  - 18
  - 19
  - 20
  - 21
  - 22
  - 23
  - 24
  - 25
  - 26
  - 27
  - 28
  - 29
  - 30
  - 31
  - 32
  - 33
  - 34
  - 35
  - 36
  - 37
  - 38
  - 39
  - 40
  - 41
  - 42
  - 43
  - 44
  - 45
  - 46
  - 47
  - 48
  - 49
  - 50
  - 51
  - 52
  - 53
  - 54
  - 55
  - 56
  - 57
  - 58
  - 59
  - 60
11. Mamede S, Schmidt HG, Rikers RM, Penaforte JC, Coelho-Filho JM. Breaking down automaticity: case ambiguity and the shift to reflective approaches in clinical reasoning. *Medical education*. 2007;41(12):1185-1192.
12. Bhugra D, Easter A, Mallaris Y, Gupta S. Clinical decision making in psychiatry by psychiatrists. *Acta psychiatrica Scandinavica*. 2011;124(5):403-411.
13. Maslovitz SB, G.; Lessing, J.; Ziv, A.; Many, A. Improved accuracy of postpartum blood loss estimation and assessed by simulation. *Acta Obstetrica et Gynecologica*. 2008;87:6.
14. Sibbald M, Sherbino J, Preyra I, Coffin-Simpson T, Norman G, Monteiro S. Eyeballing: the use of visual appearance to diagnose 'sick'. *Med Educ*. 2017;51(11):1138-1145.
15. Stolper E, Van de Wiel M, Van Royen P, Van Bokhoven M, Van der Weijden T, Dinant GJ. Gut feelings as a third track in general practitioners' diagnostic reasoning. *Journal of general internal medicine*. 2011;26(2):197-203.
16. Norman GR, Monteiro SD, Sherbino J, Ilgen JS, Schmidt HG, Mamede S. The Causes of Errors in Clinical Reasoning: Cognitive Biases, Knowledge Deficits, and Dual Process Thinking. *Academic medicine : journal of the Association of American Medical Colleges*. 2016.
17. Pope C, van Royen P, Baker R. Qualitative methods in research on healthcare quality. *Quality & safety in health care*. 2002;11(2):148-152.
18. Pope C, Ziebland S, Mays N. Qualitative research in health care. Analysing qualitative data. *BMJ (Clinical research ed.)*. 2000;320(7227):114-116.
19. Kitzinger J. Qualitative research. Introducing focus groups. *BMJ (Clinical research ed.)*. 1995;311(7000):299-302.
20. Vermeire E VRP, Griffiths F, Coenen S, Peremans L, Hendrickx K. The critical appraisal of focus group research articles. *Eur J of Gen Pract*. 2002(8):104-108.
21. Van Droogenbroeck S. Een filosofie van stille kennis in de interne geneeskunde: Etnografische studie over onzekerheid, ervaringskennis en evidence-based medicine in het diagnostisch proces. Brussel: ASP / VUBPRESS; 2015.
22. Greenhalgh T. Intuition and evidence--uneasy bedfellows? *The British journal of general practice : the journal of the Royal College of General Practitioners*. 2002;52(478):395-400.
23. Witteman CLM, Spaanjaars NL, Aarts AA. Clinical intuition in mental health care: A discussion and focus groups. *Counselling Psychology Quarterly*. 2012;25(1):19-29.
24. Kahneman D FS. A Model of Heuristic Judgement. In: *The Cambridge Handbook of Thinking and Reasoning*. New York: Cambridge University Press; 2005.
25. Evans JS, Stanovich KE. Dual-Process Theories of Higher Cognition: Advancing the Debate. *Perspectives on psychological science : a journal of the Association for Psychological Science*. 2013;8(3):223-241.
26. Kahneman D, Klein G. Conditions for intuitive expertise: a failure to disagree. *The American psychologist*. 2009;64(6):515-526.
27. Mamede S, Schmidt HG. Reflection in Medical Diagnosis: A Literature Review. *ScienceDirect*. 2017;<http://creativecommons.org/licenses/by-nc-nd/4.0/:11>.
28. Sackett DL, Rosenberg WM, Gray JA, Haynes RB, Richardson WS. Evidence based medicine: what it is and what it isn't. *BMJ*. 1996;312(7023):71-72.

- 1  
2  
3 **29.** Stolper E, Legemaate J, Dinant GJ. How do disciplinary tribunals evaluate the "gut  
4 feelings" of doctors? An analysis of Dutch tribunal decisions, 2000-2008. Journal of law  
5 and medicine. 2010;18(1):68-75.  
6  
7 **30.** Stolper E, Van Royen P, Van de Wiel M, et al. Consensus on gut feelings in general  
8 practice. BMC family practice. 2009;10:66.  
9  
10  
11  
12  
13  
14  
15  
16  
17  
18  
19  
20  
21  
22  
23  
24  
25  
26  
27  
28  
29  
30  
31  
32  
33  
34  
35  
36  
37  
38  
39  
40  
41  
42  
43  
44  
45  
46  
47  
48  
49  
50  
51  
52  
53  
54  
55  
56  
57  
58  
59  
60

For peer review only

# BMJ Open

## The role of intuitive knowledge in the diagnostic reasoning of hospital specialists. A focus group study

|                                 |                                                                                                                                                                                                                                                                                                                                                                                                                                                                                                |
|---------------------------------|------------------------------------------------------------------------------------------------------------------------------------------------------------------------------------------------------------------------------------------------------------------------------------------------------------------------------------------------------------------------------------------------------------------------------------------------------------------------------------------------|
| Journal:                        | <i>BMJ Open</i>                                                                                                                                                                                                                                                                                                                                                                                                                                                                                |
| Manuscript ID                   | bmjopen-2018-022724.R1                                                                                                                                                                                                                                                                                                                                                                                                                                                                         |
| Article Type:                   | Research                                                                                                                                                                                                                                                                                                                                                                                                                                                                                       |
| Date Submitted by the Author:   | 08-Aug-2018                                                                                                                                                                                                                                                                                                                                                                                                                                                                                    |
| Complete List of Authors:       | Van den Brink, Nydia; Universiteit Antwerpen Campus Drie Eiken, General Practice<br>Holbrechts, Birgit; Universiteit Antwerpen Campus Drie Eiken, General Practice<br>Brand, Paul; Isala klinieken, Princess Amalia Childrens Clinic<br>Stolper, Erik; University of Maastricht, CAPHRI School for Public Health and Primary Care; Universiteit Antwerpen Campus Drie Eiken, General Practice<br>Van Royen, Paul; Universiteit van Antwerpen, Decanaat Geneeskunde en Gezondheidswetenschappen |
| <b>Primary Subject Heading</b>: | Diagnostics                                                                                                                                                                                                                                                                                                                                                                                                                                                                                    |
| Secondary Subject Heading:      | Evidence based practice, Diagnostics, Medical education and training, Qualitative research                                                                                                                                                                                                                                                                                                                                                                                                     |
| Keywords:                       | clinical reasoning, hospital specialists, decision making, MEDICAL EDUCATION & TRAINING, intuition                                                                                                                                                                                                                                                                                                                                                                                             |
|                                 |                                                                                                                                                                                                                                                                                                                                                                                                                                                                                                |

SCHOLARONE™  
Manuscripts



1  
2  
3  
4 **The role of intuitive knowledge in the diagnostic reasoning of hospital specialists. A focus**  
5 **group study.**  
6  
7

8  
9 Nydia van den Brink, MD, trainee Child and Adolescent Psychiatry <sup>1</sup>  
10

11 Birgit Holbrechts, MD, trainee Internal Medicine <sup>1</sup>  
12

13 Paul Brand, Pediatrician, PhD <sup>2</sup>  
14

15 Erik CF Stolper, GP, PhD <sup>1,3</sup>  
16

17 Paul Van Royen, GP, PhD <sup>3</sup>  
18  
19  
20  
21  
22

23 <sup>1</sup> Faculty of Medicine and Health Sciences, University of Antwerp, Belgium  
24

25 <sup>2</sup> Department of Pediatrics, Isala Hospitals, Zwolle, the Netherlands  
26  
27

28 <sup>3</sup> Faculty of Health, Medicine and Life Sciences, CAPHRI School for Public Health and Primary  
29 Care, Maastricht University, the Netherlands  
30  
31  
32

33  
34  
35  
36 Correspondence to Erik Stolper, [cf.stolper@maastrichtuniversity.nl](mailto:cf.stolper@maastrichtuniversity.nl)  
37

38 Maastricht University, P.O.Box 616 6200MD Maastricht, the Netherlands, tel 0031613412248  
39

40  
41 Number of references 30  
42

43 Number of Tables 3  
44

45 Abstract: number of words 284  
46

47  
48 Main text: number of words 2751  
49

50 Key words: clinical reasoning, hospital specialists, decision making, medical education-  
51  
52  
53 cognitief/problem solving, intuition.  
54  
55  
56  
57  
58  
59  
60

## Abstract

### *Background and objective*

Intuition is an important part of human decision-making and can be explained by the dual-process theory where analytical and non-analytical reasoning processes continually interact. These processes can also be identified in physicians' diagnostic reasoning. The valuable role of intuition, including gut feelings, has been shown among general practitioners and nurses, but less is known about its role among hospital specialists. This study focused on the diagnostic reasoning of hospital specialists, how they value, experience and use intuition.

### *Design and participants*

Twenty-eight hospital specialists in the Netherlands and Belgium participated in 6 focus groups. The discussions were recorded, transcribed verbatim and thematically coded. A circular and iterative analysis was applied until data-saturation was achieved.

### *Results*

Despite initial reservations regarding the term intuition, all participants agreed that intuition plays an important role in their diagnostic reasoning process. Many agreed that intuition could guide them, but were cautious not to be misguided. They were especially cautious since intuition does not have probative force, e.g. in medico-legal situations. 'On-the-job- experience' was regarded as a precondition to relying upon intuition. Some participants viewed intuition as non-rational and invalid. All participants said that intuitive hunches must be followed by analytical reasoning. Cultural differences were not found. Both the doctor as a person and his/her specialty were seen as important determinants for using intuition.

## Conclusions

Hospital specialists use intuitive elements in their diagnostic reasoning, in line with general human decision-making models. Nevertheless they appear to disagree more on its role and value than previous research has shown among general practitioners. A better understanding of how to take advantage of intuition, while avoiding pitfalls, and how to develop 'skilled' intuition, may improve the quality of hospital specialists' diagnostic reasoning.

## Strengths and limitations of this study

- This is the first study exploring the role of intuition in hospital specialists' diagnostic reasoning.
- The study was performed in two European countries.
- The used qualitative approach enabled the researchers to study the views of specialists on the topic, and the meanings they attach to the concept.
- It was not the aim of the researchers to gather data for the calculation of predictive values of intuitive hunches such as gut feelings.

## Funding statement

This research received no specific grant from any funding agency in the public, commercial or not-for-profit sectors.

## Competing interests statement

None declared.

## Introduction

Intuitive knowledge, i.e. automatically knowing by intuition, is considered an integral part of human decision making and also a phase of clinical reasoning<sup>1,2</sup>. Research among European general practitioners (GPs) has shown that they recognize gut feelings, a specific form of intuition, as a familiar and valuable phenomenon in their diagnostic reasoning process<sup>3</sup>. In fact, when diagnosing serious infections in children, the GP's feeling 'there is something wrong' is the best predictor among all signs and symptoms<sup>4</sup>. The positive role of intuition has also been identified in the domain of nursing<sup>5-7</sup>. However, the medical literature does not provide much information about whether hospital specialists use intuitive knowledge such as gut feelings in their daily practice, and how strongly they rely on it<sup>8-11</sup>.

The existing theory on diagnostic reasoning is the dual-process theory, involving a human decision making model<sup>1,12,13</sup>. This theory assumes two continually interacting reasoning processes, analytical (AR) and non-analytical reasoning (NAR). AR is a deliberate and rational process which is slow and demanding. NAR is a fast, automatic and effortless process which is described as intuitive. AR and NAR use the same sources of knowledge and produce a similar amount of errors<sup>14</sup>.

The present study focused on the intuitive aspects of the diagnostic reasoning process of hospital specialists, i.e. physicians who are working clinically mainly within a hospital setting. How do they experience, use and value intuition? Which benefits, pitfalls, and differences between specialities do exist when using intuitive knowledge like gut feelings?

## Methods

A qualitative descriptive study design was used, exploring the views of specialists about diagnostic reasoning and intuitive knowledge, and the meanings they attach to these concepts<sup>15-17</sup>. Data was collected via focus groups, moderated by expert interviewers and two specifically trained medical students, using a topic guide (Table 1).

Three focus groups were organized in the Netherlands and three in Flanders, the Dutch speaking part of Belgium among a purposeful sample of 28 hospital specialists. The recruited participants were those specialists who are the first to see a patient at a hospital (see Table 2). They often make quick assessments of the seriousness of a patient's situation, in which intuitive knowledge may play a recognizable role<sup>8</sup>. After each focus group session, the script was adapted to elicit more explanations or to address other topics in the next groups.

Audio recordings of all discussions were transcribed verbatim and checked for errors. Data analysis was initiated with open coding. The code books, created by the Dutch and Flemish researchers, were compared and merged after consensus was reached. Based on these primary codes, a common code book was developed, with the following categories: the description of intuition, determining factors, speciality, medical education, gut feelings, others. These categories were created to support further coding and analysis of the data. A circular and iterative process was applied using cross-analysis of observed recurrent trends and codes. This circular process was terminated when data saturation was achieved. The following themes emerged during the final analysis: terminology, trust in intuition, the intuitive process, determining factors, differences and similarities between specialties, defensive medicine,

1  
2  
3 medical education, and differences between the two countries. All data was analysed using the  
4  
5 NVivo software package. The coding and analysis process was performed separately by the two  
6  
7 first authors, at that time final year medical students doing a research elective, and checked by  
8  
9 the two last authors.  
10  
11

### 12 **Patient and Public Involment statement**

13  
14  
15 There were no patients or public involved.  
16  
17

### 18 **Results**

#### 19 *Terminology*

20  
21 All participants recognized that intuitive knowledge was a part of their diagnostic reasoning  
22  
23 process (quote 1.1 see Table 3) but the way they phrased it varied, e.g. it is something that just  
24  
25 arises in you, or it is like fuzzy logic. They described intuition as a subconscious and associative  
26  
27 process. Several, sometimes vague, terms were used as synonyms, such as feeling, intuition and  
28  
29 gut feelings (quote 1.2). Some hospital specialists used the term pattern recognition to indicate  
30  
31 intuition (quote 1.3).  
32  
33  
34  
35  
36  
37  
38  
39  
40  
41

#### 42 *Trust in intuition*

43  
44 All participants recognized intuitive knowledge in their diagnostic reasoning process, but their  
45  
46 views on this concept varied widely. Some specialists said they relied strongly on their intuition,  
47  
48 while others were quite mistrusting (quote 2.1-2.2). Some participants said that intuition, gut  
49  
50 feelings and non-analytical reasoning are only based on feelings, and therefore unreliable  
51  
52 (quote 2.3). Most of the participants, however, saw intuition as something positive, providing  
53  
54  
55  
56  
57  
58  
59  
60

1  
2  
3 added value to their diagnostic process (quote 2.4). Most specialists agreed that their first  
4  
5 hypothesis, based on intuition, usually did not differ much from their final diagnosis, which  
6  
7 meant that their intuition had high validity (quote 2.5). A widely discussed pitfall was that  
8  
9 intuition can be coloured by prejudice (quote 2.6). Tunnel vision and premature closure were  
10  
11 other examples of biases which could lead to missing a diagnosis. Some specialists pointed out  
12  
13 that they should also be on the alert for a false sense of reassurance by overestimating  
14  
15 themselves (quote 2.7).  
16  
17  
18  
19  
20  
21  
22

### 23 *The intuitive process*

24  
25 The participants described intuition as presenting itself during the first contact with a patient,  
26  
27 e.g. by recognizing previously encountered disease patterns or getting a good or a bad feeling  
28  
29 when seeing a patient or hearing their story (quote 3.1). A sense of alarm was said to be  
30  
31 triggered by signals emerging from the patient's story or their symptoms and signs. Something  
32  
33 does not fit, was how this was expressed. The intuitive process often involves automatically  
34  
35 perceived findings (quote 3.2). One specialist described it as a multisensory experience of  
36  
37 intuitively received impressions of the patient (quote 3.3).  
38  
39  
40  
41

42 Intuitively generated working hypotheses may steer the further diagnostic process and  
43  
44 treatment (quote 3.4). Some participants stated that this type of reasoning saved a lot of  
45  
46 unnecessary investigations (quote 3.5).  
47  
48

49 All participants said that intuition was an important tool for starting the diagnostic process, but  
50  
51 that the final diagnosis would never be solely based on it. Intuition had to be followed by  
52  
53 analytical reasoning (quote 3.6). The participants stated that diagnostic reasoning in fact meant  
54  
55  
56  
57  
58  
59  
60

1  
2  
3 balancing between intuitive and analytical reasoning processes (quote 3.7). Solely using  
4 analytical reasoning is not possible due to lack of time (quote 3.8), while solely using intuition  
5 would lack substantiation (quote 3.6). The balance and interaction depended on the situation  
6 or context (quote 3.9). A sense of alarm, encountering insecurities or vague symptoms, would  
7 ensure that a doctor is on his/her guard and will investigate further, while a sense of  
8 reassurance can lead to 'watchful waiting'.  
9  
10  
11  
12  
13  
14  
15  
16  
17  
18  
19

### 20 *Determining factors*

21  
22 Medical knowledge and experience were often mentioned together as the basis for developing  
23 intuition (quote 4.1). The participants mentioned experience as the most important  
24 determining factor, more specifically 'on-the-job experience' and learning from one's own  
25 mistakes. The less experienced a physician is, the more analytical his/her approach will be.  
26  
27 Some participants indicated that younger doctors do not, and according to some should not,  
28 trust their gut feelings as much, and will therefore consult a specialist-tutor for further  
29 guidance (quote 4.2).  
30  
31  
32  
33  
34  
35  
36  
37  
38  
39  
40  
41

### 42 *Differences and similarities between specialties*

43  
44 Although all participants recognized the role of intuitive knowledge in their diagnostic process,  
45 doctors in the various specialties differed in the way they reached a diagnosis. The more general  
46 a speciality is, such as internal medicine or emergency medicine, the greater the role of  
47 intuition. In situations where timely decisions could be lifesaving, intuitive knowledge was  
48 regarded as a major source of judgement (quote 3.9). By contrast, some specialties, with a  
49  
50  
51  
52  
53  
54  
55  
56  
57  
58  
59  
60



1  
2  
3 limited set of diagnoses, did not need intuition frequently (quote 5.1). Paediatrics and  
4  
5 psychiatry are examples of a specialties in which intuition seems to play a major role because of  
6  
7 its more subjective nature (quote 5.2). According to the specialists, the use of intuition is more  
8  
9 accepted and appropriate among GPs, who see a large number of patients with very different  
10  
11 problems and often vague symptoms in a short time (quote 5.3). GPs' gut feelings were  
12  
13 generally regarded as valuable for hospital specialists. Although a specialist's domain is an  
14  
15 important determining factor of their use of intuition, their personality and empathic  
16  
17 capabilities (quote 5.4) also play a role. One participant viewed empathy as a prerequisite for  
18  
19 the use of intuition. Additionally, we found that specialists working in the same domain still  
20  
21 differed considerably in their views on intuition.  
22  
23  
24  
25  
26  
27  
28  
29

### 30 *Defensive medicine*

31  
32 According to the participants, society will not accept decisions based purely on intuition;  
33  
34 substantiation is needed. Some participants indicated that they underpinned their intuitively  
35  
36 gained hypotheses with rational arguments as a form of protection against accusations made  
37  
38 by colleagues or charges brought by the legal authorities (quote 6.1). Evidence-Based Medicine  
39  
40 (EBM) was viewed as useful in this respect. According to some specialists, however, EBM is not  
41  
42 always applicable in daily practice, and there should be a balance between EBM and other  
43  
44 types of reasoning (quote 6.2).  
45  
46  
47  
48  
49  
50  
51

### 52 *Medical education*

1  
2  
3 Intuition as a component of medical education was a much-discussed subject. There was  
4  
5 agreement that the development of intuition cannot be taught theoretically. 'On-the-job-  
6  
7 experience' was viewed as an important factor to acquire intuitive knowledge (quote 4.1).  
8  
9 Helpful approaches include making trainees aware of their gut feelings, and making them look  
10  
11 for triggering cues explaining the sense of alarm, as well as self-reflection, direct feedback in  
12  
13 the workplace, and experienced colleagues thinking along with them (quotes 7.1 – 7.3).  
14  
15  
16  
17  
18  
19

### 20 *Differences between the two countries*

21  
22 A comparison of the way hospital specialists in Belgium and the Netherlands value, experience  
23  
24 and use intuition revealed no differences of importance. The only differences we noticed were  
25  
26 the reservations about certain terms used in the introduction. In the Netherlands, when using  
27  
28 the term non-analytical reasoning, some participants in the first group showed resistance,  
29  
30 'since specialists should think analytically'. In the next two Dutch groups, we used the term  
31  
32 intuition during the introduction, leading to an open discussion without problems. In Flanders,  
33  
34 to avoid the same misunderstanding as in the Netherlands, we started by asking for  
35  
36 descriptions of their diagnostic reasoning process. Participants from Flanders expressed  
37  
38 reservations against the term intuition. They mentioned medico-legal aspects frequently (quote  
39  
40 6.1-6.2). In the Netherlands, these aspects were hardly discussed.  
41  
42  
43  
44  
45  
46  
47  
48  
49

### 50 **Discussion**

51  
52 This focus group study has shown that intuitive reasoning processes play an important role in  
53  
54 the diagnostic reasoning of hospital specialists. Despite certain initial reservations towards the  
55  
56  
57  
58  
59  
60

1  
2  
3 term gut feelings, many participants agreed that their intuition did guide them but they were  
4  
5 careful not to be misguided. They were especially cautious since intuition does not have  
6  
7 probative force, for instance in medico-legal situations. Although opinions concerning the  
8  
9 validity of intuition varied, the majority viewed intuition as offering added value. Intuition acts  
10  
11 as a guide in the diagnostic process or as a trigger for further investigations making fast  
12  
13 decisions possible when needed and reducing unnecessary investigations. Most medical  
14  
15 specialists used a mixture of intuitive and analytical reasoning in their diagnostic process, but  
16  
17 the balance between the two approaches was influenced by speciality and personality.  
18  
19

20  
21 This study was conducted in two countries, in several hospitals, and involved a large variety of  
22  
23 specialities, thus providing a broad view of the perceptions and use of intuition in the Dutch  
24  
25 speaking countries. Although some focus groups only included a small number of participants,  
26  
27 this led to more in-depth conversations. As potential participants for the focus groups we  
28  
29 purposefully sampled those specialists, who have the first contact in hospital with the patient  
30  
31 implying a larger number of possible diagnoses. Future research among groups of specialists  
32  
33 who do not have the first contact with patients, could reveal how intuitive reasoning processes  
34  
35 in general play in hospital specialists.  
36  
37  
38  
39  
40  
41  
42  
43  
44

45 Similar results on the value and experience of intuitive knowledge have been reported in the  
46  
47 PhD thesis by the philosopher Van Droogenbroeck<sup>18</sup>. Her ethnographic study concluded that  
48  
49 most hospital specialists initially 'fly by the auto pilot' and that a large amount of 'tacit  
50  
51 knowledge' is involved in the diagnostic process. A physician's knowledge can be  
52  
53 conceptualized as a rich network with many interlinked knowledge nodes. Most of the  
54  
55  
56  
57  
58  
59  
60

1  
2  
3 physician's knowledge is tacit, but can often be retrieved easily and mobilized. It is induced by  
4  
5 initially for the greater part unconsciously perceived cues in a specific medical problem  
6  
7  
8 resulting in a recognised pattern or triggering a sense of alarm, or by causal reasoning<sup>13,19</sup>.  
9  
10 Relevant tacit knowledge becomes mostly automatically conscious knowledge (NAR), and  
11  
12 therefore available for analysis of the medical problem (AR). It depends on the quality of the  
13  
14 physician's knowledge and expertise how accurate and effective this automatic retrieval  
15  
16 process of relevant knowledge will work out<sup>20</sup>. Sometimes one cue is enough to point to the  
17  
18 correct solution but more often different cues make sense only in the context of each other<sup>21</sup>.  
19  
20  
21 Despite the involvement of a lot of tacit knowledge in the diagnostic process, hospital  
22  
23 specialists still expressed reservations about it. The fact that our results match those by Van  
24  
25 Droogenbroeck substantiates the validity and the importance of our findings.  
26  
27  
28  
29  
30  
31

32 Studies previously performed among GPs have yielded similar findings<sup>3</sup>. Whereas GPs mainly  
33  
34 talk about gut feelings<sup>3</sup>, the hospital specialists used a variety of terms and seemed to have  
35  
36 more reservations about the terms intuition, gut feelings and NAR, and also more often  
37  
38 mentioned the possible negative consequences of intuitive reasoning processes. In general,  
39  
40 they did agree on the determinants and triggers of intuitive reasoning processes, viz. 'on-the-  
41  
42 job experience', personality, and recognizing a picture/or signs and symptoms that do or do not  
43  
44 fit. While GPs stressed the important role of contextual information in the diagnostic process<sup>3</sup>,  
45  
46 this was hardly mentioned by the hospital specialists, who emphasized experience instead. The  
47  
48 diagnostic processes of both GPs and hospital specialists consists of an interaction between  
49  
50 intuitive and analytical processes, as described in the dual-process theory<sup>3,13</sup>. Among GPs, a gut  
51  
52  
53  
54  
55  
56  
57  
58  
59  
60

1  
2  
3 feeling confirms whether the GP is on the right track or warns them that taking action is  
4 necessary<sup>13</sup>. A sense of alarm triggers a GP or hospital specialist to be on his/her guard<sup>3</sup>. Most  
5  
6  
7  
8 hospital specialists, however, agreed that a hypothesis based on intuition must be followed by  
9  
10 analytical reasoning and thus substantiated by further investigations. GPs use gut feelings more  
11  
12 as a compass, steering them through uncertain and complex situations and busy office hours<sup>3</sup>.  
13  
14

15  
16  
17  
18 Nevertheless, there is still much controversy about the use of intuition in the medical world  
19  
20<sup>22,23</sup>, even though current insights show that everybody uses a combination of intuitive and  
21  
22 analytical reasoning and that so-called 'skilled intuition' can be trusted<sup>24-26</sup>. In any case, young  
23  
24 doctors can be made aware of these current insights during their training. GPs are more  
25  
26 positive than specialists about the possibility of including intuition in medical education<sup>3</sup>.  
27  
28 Sharing the insights gained in the present study could help optimise the development of  
29  
30 intuitive reasoning processes in the training of residents.  
31  
32  
33

34  
35 Self-reflection in the diagnostic phase, and quick and expert feedback from experienced  
36  
37 colleagues pertaining to intuitive reasoning processes can improve the quality of their training  
38  
39 and improve medical care<sup>27</sup>. Learning to optimise the interaction between intuitive and  
40  
41 analytical processes may be the best way to prevent diagnostic errors. This approach perfectly  
42  
43 matches the EBM concept, which is all about integrating the best available evidence, the  
44  
45 doctor's knowledge and experience and the patient's preferences<sup>28</sup>. Implementing intuition in  
46  
47 the training of residents is consistent with the educational point of view arguing for the  
48  
49 recognition of tacit knowledge and corresponding theories<sup>18</sup>. Lastly, accepting intuition as an  
50  
51 important and valuable part of diagnostic reasoning can help it gain more recognition.  
52  
53  
54  
55  
56  
57  
58  
59  
60

1  
2  
3 Decisions made by Dutch medical disciplinary tribunals show that intuition is viewed by these  
4 colleges as part of the professional standards for doctors<sup>29</sup>, underlining the importance of  
5  
6 gaining more recognition for intuition in medico-legal contexts.  
7  
8  
9

10  
11  
12  
13 A remarkable observation we made was that the terminology regarding intuitive processes  
14 remains vague; different terms were being used as synonyms, and there were different  
15 interpretations for the same words. Based on the results of similar research done among GPs<sup>30</sup>,  
16  
17 a Delphi procedure among hospital specialists could lead to a precise and valid description of  
18  
19 intuitive processes in a hospital setting. This will increase the feasibility of implementing  
20  
21 intuition in residency training and start future additional research. Nevertheless, it might not  
22  
23 be a big problem that the concept intuition is a bit vague but it will become a problem when  
24  
25 the outcome of the intuitive process is ignored instead of integrated in the whole diagnostic  
26  
27 reasoning process. In conclusion, intuitive knowledge plays an undeniable part in diagnostic  
28  
29 reasoning of physicians, evidently also in hospitals settings. A better understanding of how to  
30  
31 take advantage of intuition, while avoiding pitfalls, and how to develop 'skilled' intuition, may  
32  
33 improve the quality of hospital specialists' diagnostic reasoning.  
34  
35  
36  
37  
38  
39  
40  
41  
42  
43  
44  
45  
46

47 *Acknowledgments:* Our thanks go out to all participants of the focus groups, to the moderators  
48  
49 Ina Brouwer and Jessica Fraeyman, to medical undergraduate students Janieke Stoeten, Sofie  
50  
51 de Groen, and Anne Schuurman.  
52  
53  
54  
55  
56  
57  
58  
59  
60

*Ethical approval:* No ethical review was required for this study because no patients were involved, and the hospital specialists were only asked about their opinions and perceptions.

### *Authorship*

All authors contributed substantially to the study.

- N. van den Brink: collecting of the data, analysis, drafting the manuscript, final approval.
- B. Holbrechts: collecting of the data, analysis, drafting the manuscript, final approval.
- P. Brand: collecting of the data, analysis, drafting the manuscript, final approval.
- C.F. Stolper: conducting the study design, collecting of the data, analysis, drafting the manuscript, final approval.
- P. Van Royen: conducting the study design, analysis, drafting the manuscript, final approval.

DATA SHARING STATEMENT: all data –the 6 transcripts, the code book, the results of the thematic analysis- are available for sharing via the corresponding author.

### **Tables**

Table 1 – Topic guide

|                                                                      |
|----------------------------------------------------------------------|
| Description of NAR, and more specifically intuition and gut feelings |
| Interaction between intuition and analytical processes               |
| Balance between intuition and analytical processes                   |
| Triggers of intuition                                                |
| Relying on intuition                                                 |

|                                  |
|----------------------------------|
| Determining factors of intuition |
| Differences between specialties  |

Table 2 - Participant specifications

|   | Date       | Location | Participants    |                                                                                                                                       |
|---|------------|----------|-----------------|---------------------------------------------------------------------------------------------------------------------------------------|
| 1 | 2013-11-28 | NL       | 6<br>♂:1<br>♀:5 | Internal medicine, paediatrics, cardiology, neurology, emergency medicine, pulmonology                                                |
| 2 | 2014-01-29 | NL       | 8<br>♂:2<br>♀:6 | Cardiology, endocrinology, gastro-enterology and hepatology, general surgery, infectious diseases, neurology, paediatrics, psychiatry |
| 3 | 2014-06-23 | NL       | 3<br>♂:2<br>♀:1 | Dermatology, nephrology, neurology                                                                                                    |
| 4 | 2015-03-16 | BE       | 5<br>♂:3<br>♀:2 | Abdominal surgery, emergency medicine, neurology, neurosurgery, paediatrics                                                           |
| 5 | 2015-10-22 | BE       | 4<br>♂:2<br>♀:2 | Hepatobiliary, transplantation and endocrine surgery, neurosurgery, psychiatry, sexology                                              |
| 6 | 2015-12-15 | BE       | 2<br>♂:2<br>♀:0 | Emergency medicine                                                                                                                    |

Table 3 Quotes

|                       | Focus group | Quote                                                                                                                                                                                                                         |
|-----------------------|-------------|-------------------------------------------------------------------------------------------------------------------------------------------------------------------------------------------------------------------------------|
| Description intuition |             |                                                                                                                                                                                                                               |
| 1.1                   | NL 2        | We all have this, if we first meet a patient, those first couple of seconds that you see somebody, you get a feeling of whether the situation is serious or not, alarming or not.                                             |
| 1.2                   | NL 2        | Yes, when you mention intuitive thinking I obviously immediately think about my professional domain and about gut feeling.                                                                                                    |
| 1.3                   | NL 3        | For me the word intuition is more...erm... something that doesn't rely on knowledge or experience, but more a sort of feeling, and to me what you're referring to, and what I mean, is not a feeling but pattern recognition. |
| Relying on intuition  |             |                                                                                                                                                                                                                               |
| 2.1                   | NL 1        | Well, at a certain moment you feel this is what it is, more or less, and that's a feeling I have very strongly with patients and // at the                                                                                    |



|                                                  |      |                                                                                                                                                                                                                                                                                                                                                                                                                                |
|--------------------------------------------------|------|--------------------------------------------------------------------------------------------------------------------------------------------------------------------------------------------------------------------------------------------------------------------------------------------------------------------------------------------------------------------------------------------------------------------------------|
|                                                  |      | hospital I rely on my feelings... well... for about 80%.                                                                                                                                                                                                                                                                                                                                                                       |
| 2.2                                              | BE 3 | I also distrust it. I do use it, but I also distrust it, right?                                                                                                                                                                                                                                                                                                                                                                |
| 2.3                                              | NL 3 | Some of us in the group are very allergic to the word gut feelings. They think that as a doctor you can't use that term. But at the same time, I think that everyone knows that it does exist.                                                                                                                                                                                                                                 |
| 2.4                                              | BE 2 | It offers a certain advantage I think. You argue more correctly if you also use that intuition.                                                                                                                                                                                                                                                                                                                                |
| 2.5                                              | NL 2 | Yes, I don't experience a discrepancy either between the initial gut feeling, or whatever you want to call it, and what comes out in the end.                                                                                                                                                                                                                                                                                  |
| 2.6                                              | BE 2 | I actually agree with what you say about the initial thought being biased, that gut feeling, by what you know before the patient enters, by what you saw in C2M [electronic medical record], by what the secretary has said when introducing the patient, by what you might have heard from the GP on the phone. So, you often get a biased picture.                                                                           |
| 2.7                                              | BE 2 | Then you tell yourself I can skip that clinical examination, because last time nothing came out.                                                                                                                                                                                                                                                                                                                               |
| Intuition in the process of diagnostic reasoning |      |                                                                                                                                                                                                                                                                                                                                                                                                                                |
| - Presentation of intuition                      |      |                                                                                                                                                                                                                                                                                                                                                                                                                                |
| 3.1                                              | BE 2 | Even if you just hear a story from an assistant // Then the first thing is that there is something in in your guts, something that says this is alarming or reassuring. And then you listen very critically, to the whole story... By also building up a systemic picture.                                                                                                                                                     |
| - Triggers of intuition                          |      |                                                                                                                                                                                                                                                                                                                                                                                                                                |
| 3.2                                              | BE 2 | But well, observations are always partly intuitive, aren't they? You first look at what is going on with the person in front of you. What he's saying. I think it's like that in all specialities. You don't immediately work systematically.                                                                                                                                                                                  |
| 3.3                                              | BE 1 | There's a lot more involved then. What does the patient look like? At that moment it's a kind of multisensory experience. What does the patient look like? How is his breathing, and you listen to that for a while. Yes, there's a lot more to it than listening to their story on the phone. On the phone, it's purely factual, based on a number of questions. If you can actually see the patient, it's totally different. |
| - Intuition provides guidance                    |      |                                                                                                                                                                                                                                                                                                                                                                                                                                |

|                                                   |      |                                                                                                                                                                                                                                                                     |
|---------------------------------------------------|------|---------------------------------------------------------------------------------------------------------------------------------------------------------------------------------------------------------------------------------------------------------------------|
| 3.4                                               | NL 2 | But the intuition helps you, gives you guidance.                                                                                                                                                                                                                    |
| 3.5                                               | NL 1 | That's how I've spared a hundred children some complicated investigation.                                                                                                                                                                                           |
| - NAR is followed by AR                           |      |                                                                                                                                                                                                                                                                     |
| 3.6                                               | BE 3 | I often find it an important tool at the start, but it's never going to be the only factor in the eventual conclusion and the eventual decision on the diagnosis and therapy for the patient.                                                                       |
| - Interaction and balance between NAR and AR      |      |                                                                                                                                                                                                                                                                     |
| 3.7                                               | BE 2 | You have to find the balance between intuition and systematic approach.                                                                                                                                                                                             |
| 3.8                                               | BE 3 | I think it's obvious that at busy moments, simply because there's no other option, you sometimes have to rely on gut feelings. Even if it's only because you don't have time for analytical reasoning.                                                              |
| 3.9                                               | BE 3 | But I'm convinced that experienced emergency specialists regularly rely on their gut feelings, to make a quick first assessment of the degree of urgency. Maybe even more than in other disciplines.                                                                |
| Determinants of intuition                         |      |                                                                                                                                                                                                                                                                     |
| 4.1                                               | NL 2 | Because intuition is made up of experience and knowledge.                                                                                                                                                                                                           |
| 4.2                                               | BE 2 | I think some doctors who are less able to rely on that experience, on that intuition, they have to fall back on systematics. And so as you gain more experience, you can let go of that to some extent.                                                             |
| Differences and similarities between specialities |      |                                                                                                                                                                                                                                                                     |
| 5.1                                               | NL 1 | I always think, cardiology is of course a very different discipline, because we have, I believe, something like ten illness scripts, yes and I just check them all. Could it be this, or that? And we can actually image everything, so we can often figure it out. |
| 5.2                                               | BE 2 | Subjectivity plays an important part, so you automatically start to make more use of the intuitive. ( <i>a psychiatrist</i> )                                                                                                                                       |
| 5.3                                               | BE 3 | No, but general practitioners also need to deal with a different form of uncertainty, and are not held to account for that, the way it happens at a hospital. GPs are able to work with uncertainties. And that's a lot more difficult for a hospital doctor.       |
| 5.4                                               | BE 3 | A necessary condition for using intuition is, for example, empathy. So the better you're able to understand what the patient means or feels, the better of course you can assess the situation // There are people who are simply purely scientifically             |

|                    |      |                                                                                                                                                                                                                                                                                                                                                                    |
|--------------------|------|--------------------------------------------------------------------------------------------------------------------------------------------------------------------------------------------------------------------------------------------------------------------------------------------------------------------------------------------------------------------|
|                    |      | oriented and have no empathic ability. Those are people who are less likely to develop this kind of intuition, or they develop it in a less valuable way.                                                                                                                                                                                                          |
| Defensive medicine |      |                                                                                                                                                                                                                                                                                                                                                                    |
| 6.1                | BE 2 | That [I've made this decision based on my intuition] is not something you can say before a court, right?                                                                                                                                                                                                                                                           |
| 6.2                | BE 3 | And of course in situations where you don't yet have the experience, you'll need to rely on the evidence to some extent, and after you have gained the experience, you still have to keep looking at the evidence from the literature, and maintain a balance between the two.                                                                                     |
| Medical education  |      |                                                                                                                                                                                                                                                                                                                                                                    |
| 7.1                | NL1  | Yes, that's exactly when you have to check, I think always, or occasionally, why do I get this feeling, right? And that's what's so good about a hospital like this, that there is a trainee doctor sitting beside you. And when you tell them it's this or that, you need to explain why you get that feeling.                                                    |
| 7.2.               | BE 1 | It should encourage you to recognize that feeling that arises and then to think right, I need to do something about this, in the sense of further reflection or especially thinking why do I get this feeling with this particular patient? // In my case, that often induces me to broaden my scope or to discuss it with someone else or consult another book... |
| 7.3                | BE 2 | When trainees see patients they get feedback on their findings. I think that's very important. Also with regard to this intuitive thinking. But I think, erm, what you could also do in their training. is emphasise its value more.                                                                                                                               |

## References

1. Kahneman D. A perspective on judgment and choice: mapping bounded rationality. *The Am Psychol.* 2003;58(9):697-720.
2. Monteiro S, Norman G, Sherbino J. The 3 faces of clinical reasoning: Epistemological explorations of disparate error reduction strategies. *J Eval Clin Pract.* 2018;24(3):666-673.
3. Stolper E, van Bokhoven M, Houben P, et al. The diagnostic role of gut feelings in general practice. A focus group study of the concept and its determinants. *BMC Fam Pract.* 2009;10:17.

4. Van den Bruel A, Aertgeerts B, Bruyninckx R, Aerts M, Buntinx F. Signs and symptoms for diagnosis of serious infections in children: a prospective study in primary care. *Br J Gen Pract.* 2007;57(540):538-546.
5. Chilcote DR. Intuition: A Concept Analysis. *Nursing Forum.* 2017;52(1):62-67.
6. Melin-Johansson C, Palmqvist R, Ronnberg L. Clinical intuition in the nursing process and decision-making - A mixed studies review. *J Clin Nurs.* 2017.
7. Richards K. Intuition: A Powerful Self-Care Tool for a Life that Thrives. *Nursing Economics.* 2015;33(5):285-287.
8. Wiswell J, Tsao K, Bellolio MF, Hess EP, Cabrera D. "Sick" or "not-sick": accuracy of System 1 diagnostic reasoning for the prediction of disposition and acuity in patients presenting to an academic ED. *Am J Emerg Med.* 2013;31(10):1448-1452.
9. Calder LA, Forster AJ, Stiell IG, et al. Experiential and rational decision making: a survey to determine how emergency physicians make clinical decisions. *Emerg Med J* 2012;29(10):811-816.
10. Mamede S, Schmidt HG, Rikers RM, Penaforte JC, Coelho-Filho JM. Breaking down automaticity: case ambiguity and the shift to reflective approaches in clinical reasoning. *Med Educ.* 2007;41(12):1185-1192.
11. Sibbald M, Sherbino J, Preyra I, Coffin-Simpson T, Norman G, Monteiro S. Eyeballing: the use of visual appearance to diagnose 'sick'. *Med Educ.* 2017;51(11):1138-1145.
12. Pelaccia T, Tardif J, Tribby E, Charlin B. An analysis of clinical reasoning through a recent and comprehensive approach: the dual-process theory. *Med Educ Online.* 2011;16.
13. Stolper CF, Van de Wiel M, Van Royen P, Van Bokhoven MA, Van der Weijden T, Dinant GJ. Gut feelings as a third track in general practitioners' diagnostic reasoning. *J Gen Intern Med.* 2011;26(2):197-203.
14. Norman GR, Monteiro SD, Sherbino J, Ilgen JS, Schmidt HG, Mamede S. The Causes of Errors in Clinical Reasoning: Cognitive Biases, Knowledge Deficits, and Dual Process Thinking. *Academic medicine : J Ass Am Med Coll.* 2016.
15. Pope C, van Royen P, Baker R. Qualitative methods in research on healthcare quality. *Quality & Safety in Health Care.* 2002;11(2):148-152.
16. Pope C, Ziebland S, Mays N. Qual Research in Health Care. *Analysing qualitative data.* *BMJ (Clinical research ed.).* 2000;320(7227):114-116.
17. Kitzinger J. Qualitative research. Introducing focus groups. *BMJ (Clinical research ed.).* 1995;311(7000):299-302.
18. Van Droogenbroeck S. Een filosofie van stille kennis in de interne geneeskunde: Etnografische studie over onzekerheid, ervaringskennis en evidence-based medicine in het diagnostisch proces. Brussel: ASP / VUBPRESS; 2015.
19. Anderson JR. ACT: a simple theory of complex cognition. *Am Psychol.* 1996;51(4).
20. Norman GR, Eva K, Brooks LR, Hamstra S. Expertise in Medicine and Surgery. In: Ericsson KA, Charness N, Feltovich PJ, Hoffman RR. *The Cambridge Handbook of Expertise and Expert Performance.* New York: Cambridge University Press; 2006.
21. Isenman L. Understanding unconscious intelligence and intuition: "blink" and beyond. *Persp in Biol and Med.* 2013;56(1):148-166.
22. Greenhalgh T. Intuition and evidence - uneasy bedfellows? *Br J Gen Pract.* 2002;52(478):395-400.

- 1
- 2
- 3
- 4 **23.** Witteman CLM, Spaanjaars NL, Aarts AA. Clinical intuition in mental health care: A
- 5 discussion and focus groups. *Counselling Psychology Quarterly*. 2012;25(1):19-29.
- 6 **24.** Kahneman D FS. A Model of Heuristic Judgement. In: *The Cambridge Handbook of*
- 7 *Thinking and Reasoning*. New York: Cambridge University Press; 2005.
- 8 **25.** Evans JS, Stanovich KE. Dual-Process Theories of Higher Cognition: Advancing the
- 9 Debate. *Perspectives on Psychological Science : J Ass Psychol Science*. 2013;8(3):223-
- 10 241.
- 11 **26.** Kahneman D, Klein G. Conditions for intuitive expertise: a failure to disagree. *The Am*
- 12 *Psychol*. 2009;64(6):515-526.
- 13 **27.** Mamede S, Schmidt HG. Reflection in Medical Diagnosis: A Literature Review. *Health*
- 14 *Professions Education*. 2017;3(1):15-25.
- 15 **28.** Sackett DL, Rosenberg WM, Gray JA, Haynes RB, Richardson WS. Evidence based
- 16 medicine: what it is and what it isn't. *BMJ*. 1996;312(7023):71-72.
- 17 **29.** Stolper E, Legemaate J, Dinant GJ. How do disciplinary tribunals evaluate the "gut
- 18 feelings" of doctors? An analysis of Dutch tribunal decisions, 2000-2008. *J Law and Med*.
- 19 *2010;18(1):68-75*.
- 20 **30.** Stolper E, Van Royen P, Van de Wiel M, et al. Consensus on gut feelings in general
- 21 practice. *BMC Fam Pract*. 2009;10:66.
- 22
- 23
- 24
- 25
- 26
- 27
- 28
- 29
- 30
- 31
- 32
- 33
- 34
- 35
- 36
- 37
- 38
- 39
- 40
- 41
- 42
- 43
- 44
- 45
- 46
- 47
- 48
- 49
- 50
- 51
- 52
- 53
- 54
- 55
- 56
- 57
- 58
- 59
- 60

# BMJ Open

## The role of intuitive knowledge in the diagnostic reasoning of hospital specialists. A focus group study

|                                 |                                                                                                                                                                                                                                                                                                                                                                                                                                                                                                |
|---------------------------------|------------------------------------------------------------------------------------------------------------------------------------------------------------------------------------------------------------------------------------------------------------------------------------------------------------------------------------------------------------------------------------------------------------------------------------------------------------------------------------------------|
| Journal:                        | <i>BMJ Open</i>                                                                                                                                                                                                                                                                                                                                                                                                                                                                                |
| Manuscript ID                   | bmjopen-2018-022724.R2                                                                                                                                                                                                                                                                                                                                                                                                                                                                         |
| Article Type:                   | Research                                                                                                                                                                                                                                                                                                                                                                                                                                                                                       |
| Date Submitted by the Author:   | 07-Dec-2018                                                                                                                                                                                                                                                                                                                                                                                                                                                                                    |
| Complete List of Authors:       | Van den Brink, Nydia; Universiteit Antwerpen Campus Drie Eiken, General Practice<br>Holbrechts, Birgit; Universiteit Antwerpen Campus Drie Eiken, General Practice<br>Brand, Paul; Isala klinieken, Princess Amalia Childrens Clinic<br>Stolper, Erik; University of Maastricht, CAPHRI School for Public Health and Primary Care; Universiteit Antwerpen Campus Drie Eiken, General Practice<br>Van Royen, Paul; Universiteit van Antwerpen, Decanaat Geneeskunde en Gezondheidswetenschappen |
| <b>Primary Subject Heading</b>: | Diagnostics                                                                                                                                                                                                                                                                                                                                                                                                                                                                                    |
| Secondary Subject Heading:      | Evidence based practice, Diagnostics, Medical education and training, Qualitative research                                                                                                                                                                                                                                                                                                                                                                                                     |
| Keywords:                       | clinical reasoning, hospital specialists, decision making, MEDICAL EDUCATION & TRAINING, intuition                                                                                                                                                                                                                                                                                                                                                                                             |
|                                 |                                                                                                                                                                                                                                                                                                                                                                                                                                                                                                |

SCHOLARONE™  
Manuscripts

1  
2  
3  
4 **The role of intuitive knowledge in the diagnostic reasoning of hospital specialists. A focus**  
5 **group study.**  
6  
7

8  
9 Nydia van den Brink, MD, trainee Child and Adolescent Psychiatry <sup>1</sup>  
10

11 Birgit Holbrechts, MD, trainee Internal Medicine <sup>1</sup>  
12

13 Paul Brand, Pediatrician, PhD <sup>2</sup>  
14

15 Erik CF Stolper, GP, PhD <sup>1,3</sup>  
16

17 Paul Van Royen, GP, PhD <sup>3</sup>  
18  
19  
20  
21  
22

23 <sup>1</sup> Faculty of Medicine and Health Sciences, University of Antwerp, Belgium  
24

25 <sup>2</sup> Department of Pediatrics, Isala Hospitals, Zwolle, the Netherlands  
26  
27

28 <sup>3</sup> Faculty of Health, Medicine and Life Sciences, CAPHRI School for Public Health and Primary  
29 Care, Maastricht University, the Netherlands  
30  
31  
32

33  
34  
35  
36 Correspondence to Erik Stolper, [cf.stolper@maastrichtuniversity.nl](mailto:cf.stolper@maastrichtuniversity.nl)  
37

38 Maastricht University, P.O.Box 616 6200MD Maastricht, the Netherlands, tel 0031613412248  
39

40 Number of references 30  
41

42 Number of Tables 3  
43

44 Abstract: number of words 284  
45

46 Main text: number of words 2751  
47

48 Key words: clinical reasoning, hospital specialists, decision making, medical education-  
49  
50  
51  
52  
53 cognitief/problem solving, intuition.  
54  
55  
56  
57  
58  
59  
60

## Abstract

### *Background and objective*

Intuition is an important part of human decision-making and can be explained by the dual-process theory where analytical and non-analytical reasoning processes continually interact. These processes can also be identified in physicians' diagnostic reasoning. The valuable role of intuition, including gut feelings, has been shown among general practitioners and nurses, but less is known about its role among hospital specialists. This study focused on the diagnostic reasoning of hospital specialists, how they value, experience and use intuition.

### *Design and participants*

Twenty-eight hospital specialists in the Netherlands and Belgium participated in 6 focus groups. The discussions were recorded, transcribed verbatim and thematically coded. A circular and iterative analysis was applied until data-saturation was achieved.

### *Results*

Despite initial reservations regarding the term intuition, all participants agreed that intuition plays an important role in their diagnostic reasoning process. Many agreed that intuition could guide them, but were cautious not to be misguided. They were especially cautious since intuition does not have probative force, e.g. in medico-legal situations. 'On-the-job- experience' was regarded as a precondition to relying upon intuition. Some participants viewed intuition as non-rational and invalid. All participants said that intuitive hunches must be followed by analytical reasoning. Cultural differences were not found. Both the doctor as a person and his/her specialty were seen as important determinants for using intuition.



## Conclusions

Hospital specialists use intuitive elements in their diagnostic reasoning, in line with general human decision-making models. Nevertheless they appear to disagree more on its role and value than previous research has shown among general practitioners. A better understanding of how to take advantage of intuition, while avoiding pitfalls, and how to develop 'skilled' intuition, may improve the quality of hospital specialists' diagnostic reasoning.

## Strengths and limitations of this study

- This is the first study exploring the role of intuition in hospital specialists' diagnostic reasoning.
- The study was performed in two European countries.
- The used qualitative approach enabled the researchers to study the views of specialists on the topic, and the meanings they attach to the concept.
- It was not the aim of the researchers to gather data for the calculation of predictive values of intuitive hunches such as gut feelings.

## Funding statement

This research received no specific grant from any funding agency in the public, commercial or not-for-profit sectors.

## Competing interests statement

None declared.

## Introduction

Intuitive knowledge, i.e. automatically knowing by intuition, is considered an integral part of human decision making and also a phase of clinical reasoning<sup>1,2</sup>. Research among European general practitioners (GPs) has shown that they recognize gut feelings, a specific form of intuition, as a familiar and valuable phenomenon in their diagnostic reasoning process<sup>3</sup>. In fact, when diagnosing serious infections in children, the GP's feeling 'there is something wrong' is the best predictor among all signs and symptoms<sup>4</sup>. The positive role of intuition has also been identified in the domain of nursing<sup>5-7</sup>. However, the medical literature does not provide much information about whether hospital specialists use intuitive knowledge such as gut feelings in their daily practice, and how strongly they rely on it<sup>8-11</sup>.

The existing theory on diagnostic reasoning is the dual-process theory, involving a human decision making model<sup>1,12,13</sup>. This theory assumes two continually interacting reasoning processes, analytical (AR) and non-analytical reasoning (NAR). AR is a deliberate and rational process which is slow and demanding. NAR is a fast, automatic and effortless process which is described as intuitive. AR and NAR produce a similar amount of errors<sup>14</sup>.

The present study focused on the intuitive aspects of the diagnostic reasoning process of hospital specialists, i.e. physicians who are working clinically mainly within a hospital setting. How do they experience, use and value intuition? Which benefits, pitfalls, and differences between specialities do exist when using intuitive knowledge like gut feelings?

## Methods

A qualitative descriptive study design was used, exploring the views of specialists about diagnostic reasoning and intuitive knowledge, and the meanings they attach to these concepts<sup>15-17</sup>. Data was collected via focus groups, moderated by expert interviewers and two specifically trained medical students, using a topic guide (Table 1).

Three focus groups were organized in the Netherlands and three in Flanders, the Dutch speaking part of Belgium among a purposeful sample of 28 hospital specialists. The recruited participants were those specialists who are the first to see a patient at a hospital (see Table 2). They often make quick assessments of the seriousness of a patient's situation, in which intuitive knowledge may play a recognizable role<sup>8</sup>. After each focus group session, the script was adapted to elicit more explanations or to address other topics in the next groups.

Audio recordings of all discussions were transcribed verbatim and checked for errors. Data analysis was initiated with open coding. The code books, created by the Dutch and Flemish researchers, were compared and merged after consensus was reached. Based on these primary codes, a common code book was developed, with the following categories: the description of intuition, determining factors, speciality, medical education, gut feelings, others. These categories were created to support further coding and analysis of the data. A circular and iterative process was applied using cross-analysis of observed recurrent trends and codes. This circular process was terminated when data saturation was achieved. The following themes emerged during the final analysis: terminology, trust in intuition, the intuitive process, determining factors, differences and similarities between specialties, defensive medicine, medical education, and differences between the two countries. All data was analysed using the

1  
2  
3 NVivo software package. The coding and analysis process was performed separately by the two  
4  
5 first authors, at that time final year medical students doing a research elective, and checked by  
6  
7 the two last authors.  
8  
9

### 10 **Patient and Public Involvement statement**

11  
12 There were no patients or public involved.  
13  
14  
15

### 16 **Results**

#### 17 *Terminology*

18  
19 All participants recognized that intuitive knowledge was a part of their diagnostic reasoning  
20  
21 process (quote 1.1 see Table 3) but the way they phrased it varied, e.g. it is something that just  
22  
23 arises in you, or it is like fuzzy logic. They described intuition as a subconscious and associative  
24  
25 process. Several, sometimes vague, terms were used as synonyms, such as feeling, intuition and  
26  
27 gut feelings (quote 1.2). Some hospital specialists used the term pattern recognition to indicate  
28  
29 intuition (quote 1.3).  
30  
31  
32  
33  
34  
35  
36  
37  
38  
39

#### 40 *Trust in intuition*

41  
42 All participants recognized intuitive knowledge in their diagnostic reasoning process, but their  
43  
44 views on this concept varied widely. Some specialists said they relied strongly on their intuition,  
45  
46 while others were quite mistrusting (quote 2.1-2.2). Some participants said that intuition, gut  
47  
48 feelings and non-analytical reasoning are only based on feelings, and therefore unreliable  
49  
50 (quote 2.3). Most of the participants, however, saw intuition as something positive, providing  
51  
52 added value to their diagnostic process (quote 2.4). Most specialists agreed that their first  
53  
54  
55  
56  
57  
58  
59  
60

1  
2  
3 hypothesis, based on intuition, usually did not differ much from their final diagnosis, which  
4  
5 meant that their intuition had high validity (quote 2.5). A widely discussed pitfall was that  
6  
7 intuition can be coloured by prejudice (quote 2.6). Tunnel vision and premature closure were  
8  
9 other examples of biases which could lead to missing a diagnosis. Some specialists pointed out  
10  
11 that they should also be on the alert for a false sense of reassurance by overestimating  
12  
13 themselves (quote 2.7).  
14  
15  
16  
17  
18  
19

### 20 *The intuitive process*

21  
22 The participants described intuition as presenting itself during the first contact with a patient,  
23  
24 e.g. by recognizing previously encountered disease patterns or getting a good or a bad feeling  
25  
26 when seeing a patient or hearing their story (quote 3.1). A sense of alarm was said to be  
27  
28 triggered by signals emerging from the patient's story or their symptoms and signs. Something  
29  
30 does not fit, was how this was expressed. The intuitive process often involves automatically  
31  
32 perceived findings (quote 3.2). One specialist described it as a multisensory experience of  
33  
34 intuitively received impressions of the patient (quote 3.3).  
35  
36  
37  
38

39  
40 Intuitively generated working hypotheses may steer the further diagnostic process and  
41  
42 treatment (quote 3.4). Some participants stated that this type of reasoning saved a lot of  
43  
44 unnecessary investigations (quote 3.5).  
45  
46

47 All participants said that intuition was an important tool for starting the diagnostic process, but  
48  
49 that the final diagnosis would never be solely based on it. Intuition had to be followed by  
50  
51 analytical reasoning (quote 3.6). The participants stated that diagnostic reasoning in fact meant  
52  
53 balancing between intuitive and analytical reasoning processes (quote 3.7). Solely using  
54  
55  
56  
57  
58  
59  
60

1  
2  
3 analytical reasoning is not possible due to lack of time (quote 3.8), while solely using intuition  
4  
5 would lack substantiation (quote 3.6). The balance and interaction depended on the situation  
6  
7 or context (quote 3.9). A sense of alarm, encountering insecurities or vague symptoms, would  
8  
9 ensure that a doctor is on his/her guard and will investigate further, while a sense of  
10  
11 reassurance can lead to 'watchful waiting'.  
12  
13  
14

### 15 16 17 18 *Determining factors*

19  
20 Medical knowledge and experience were often mentioned together as the basis for developing  
21  
22 intuition (quote 4.1). The participants mentioned experience as the most important  
23  
24 determining factor, more specifically 'on-the-job experience' and learning from one's own  
25  
26 mistakes. The less experienced a physician is, the more analytical his/her approach will be.  
27  
28 Some participants indicated that younger doctors do not, and according to some should not,  
29  
30 trust their gut feelings as much, and will therefore consult a specialist-tutor for further  
31  
32 guidance (quote 4.2).  
33  
34  
35  
36  
37  
38  
39

### 40 *Differences and similarities between specialties*

41  
42 Although all participants recognized the role of intuitive knowledge in their diagnostic process,  
43  
44 doctors in the various specialties differed in the way they reached a diagnosis. The more general  
45  
46 a speciality is, such as internal medicine or emergency medicine, the greater the role of  
47  
48 intuition. In situations where timely decisions could be lifesaving, intuitive knowledge was  
49  
50 regarded as a major source of judgement (quote 3.9). By contrast, some specialities, with a  
51  
52 limited set of diagnoses, did not need intuition frequently (quote 5.1). Paediatrics and  
53  
54  
55  
56  
57  
58  
59

1  
2  
3 psychiatry are examples of a specialties in which intuition seems to play a major role because of  
4  
5 its more subjective nature (quote 5.2). According to the specialists, the use of intuition is more  
6  
7 accepted and appropriate among GPs, who see a large number of patients with very different  
8  
9 problems and often vague symptoms in a short time (quote 5.3). GPs' gut feelings were  
10  
11 generally regarded as valuable for hospital specialists. Although a specialist's domain is an  
12  
13 important determining factor of their use of intuition, their personality and empathic  
14  
15 capabilities (quote 5.4) also play a role. One participant viewed empathy as a prerequisite for  
16  
17 the use of intuition. Additionally, we found that specialists working in the same domain still  
18  
19 differed considerably in their views on intuition.  
20  
21  
22  
23  
24  
25  
26  
27

### 28 *Defensive medicine*

29  
30 According to the participants, society will not accept decisions based purely on intuition;  
31  
32 substantiation is needed. Some participants indicated that they underpinned their intuitively  
33  
34 gained hypotheses with rational arguments as a form of protection against accusations made  
35  
36 by colleagues or charges brought by the legal authorities (quote 6.1). Evidence-Based Medicine  
37  
38 (EBM) was viewed as useful in this respect. According to some specialists, however, EBM is not  
39  
40 always applicable in daily practice, and there should be a balance between EBM and other  
41  
42 types of reasoning (quote 6.2).  
43  
44  
45  
46  
47  
48  
49

### 50 *Medical education*

51  
52 Intuition as a component of medical education was a much-discussed subject. There was  
53  
54 agreement that the development of intuition cannot be taught theoretically. 'On-the-job-  
55  
56  
57  
58  
59  
60

1  
2  
3 experience' was viewed as an important factor to acquire intuitive knowledge (quote 4.1).  
4  
5 Helpful approaches include making trainees aware of their gut feelings, and making them look  
6  
7 for triggering cues explaining the sense of alarm, as well as self-reflection, direct feedback in  
8  
9 the workplace, and experienced colleagues thinking along with them (quotes 7.1 – 7.3).  
10  
11  
12  
13  
14

### 15 *Differences between the two countries*

16  
17 A comparison of the way hospital specialists in Belgium and the Netherlands value, experience  
18  
19 and use intuition revealed no differences of importance. The only differences we noticed were  
20  
21 the reservations about certain terms used in the introduction. In the Netherlands, when using  
22  
23 the term non-analytical reasoning, some participants in the first group showed resistance,  
24  
25 'since specialists should think analytically'. In the next two Dutch groups, we used the term  
26  
27 intuition during the introduction, leading to an open discussion without problems. In Flanders,  
28  
29 to avoid the same misunderstanding as in the Netherlands, we started by asking for  
30  
31 descriptions of their diagnostic reasoning process. Participants from Flanders expressed  
32  
33 reservations against the term intuition. They mentioned medico-legal aspects frequently (quote  
34  
35 6.1-6.2). In the Netherlands, these aspects were hardly discussed.  
36  
37  
38  
39  
40  
41  
42  
43  
44

### 45 **Discussion**

46  
47 This focus group study has shown that intuitive reasoning processes play an important role in  
48  
49 the diagnostic reasoning of hospital specialists. Despite certain initial reservations towards the  
50  
51 term gut feelings, many participants agreed that their intuition did guide them but they were  
52  
53 careful not to be misguided. They were especially cautious since intuition does not have  
54  
55  
56  
57  
58  
59  
60



1  
2  
3 probative force, for instance in medico-legal situations. Although opinions concerning the  
4  
5 validity of intuition varied, the majority viewed intuition as offering added value. Intuition acts  
6  
7 as a guide in the diagnostic process or as a trigger for further investigations making fast  
8  
9 decisions possible when needed and reducing unnecessary investigations. Most medical  
10  
11 specialists used a mixture of intuitive and analytical reasoning in their diagnostic process, but  
12  
13 the balance between the two approaches was influenced by speciality and personality.  
14  
15

16  
17 This study was conducted in two countries, in several hospitals, and involved a large variety of  
18  
19 specialities, thus providing a broad view of the perceptions and use of intuition in the Dutch  
20  
21 speaking countries. Although some focus groups only included a small number of participants,  
22  
23 this led to more in-depth conversations. As potential participants for the focus groups we  
24  
25 purposefully sampled those specialists, who have the first contact in hospital with the patient  
26  
27 implying a larger number of possible diagnoses. Future research among groups of specialists  
28  
29 who do not have the first contact with patients, could reveal how intuitive reasoning processes  
30  
31 in general play in hospital specialists.  
32  
33  
34  
35  
36  
37  
38  
39

40 Similar results on the value and experience of intuitive knowledge have been reported in the  
41  
42 PhD thesis by the philosopher Van Droogenbroeck <sup>18</sup>. Her ethnographic study concluded that  
43  
44 most hospital specialists initially 'fly by the auto pilot' and that a large amount of 'tacit  
45  
46 knowledge' is involved in the diagnostic process. A physician's knowledge can be  
47  
48 conceptualized as a rich network with many interlinked knowledge nodes. Most of the  
49  
50 physician's knowledge is tacit, but can often be retrieved easily and mobilized. It is induced by  
51  
52 initially for the greater part unconsciously perceived cues in a specific medical problem  
53  
54  
55  
56  
57  
58  
59

1  
2  
3 resulting in a recognised pattern or triggering a sense of alarm, or by causal reasoning<sup>13,19</sup>.  
4  
5 Relevant tacit knowledge becomes mostly automatically conscious knowledge (NAR), and  
6  
7 therefore available for analysis of the medical problem (AR). It depends on the quality of the  
8  
9 physician's knowledge and expertise how accurate and effective this automatic retrieval  
10  
11 process of relevant knowledge will work out<sup>20</sup>. Sometimes one cue is enough to point to the  
12  
13 correct solution but more often different cues make sense only in the context of each other<sup>21</sup>.  
14  
15 Despite the involvement of a lot of tacit knowledge in the diagnostic process, hospital  
16  
17 specialists still expressed reservations about it. The fact that our results match those by Van  
18  
19 Droogenbroeck substantiates the validity and the importance of our findings.  
20  
21  
22  
23  
24  
25  
26  
27

28 Studies previously performed among GPs have yielded similar findings<sup>3</sup>. Whereas GPs mainly  
29  
30 talk about gut feelings<sup>3</sup>, the hospital specialists used a variety of terms and seemed to have  
31  
32 more reservations about the terms intuition, gut feelings and NAR, and also more often  
33  
34 mentioned the possible negative consequences of intuitive reasoning processes. In general,  
35  
36 they did agree on the determinants and triggers of intuitive reasoning processes, viz. 'on-the-  
37  
38 job experience', personality, and recognizing a picture/or signs and symptoms that do or do not  
39  
40 fit. While GPs stressed the important role of contextual information in the diagnostic process<sup>3</sup>,  
41  
42 this was hardly mentioned by the hospital specialists, who emphasized experience instead. The  
43  
44 diagnostic processes of both GPs and hospital specialists consists of an interaction between  
45  
46 intuitive and analytical processes, as described in the dual-process theory<sup>3,13</sup>. Among GPs, a gut  
47  
48 feeling confirms whether the GP is on the right track or warns them that taking action is  
49  
50 necessary<sup>13</sup>. A sense of alarm triggers a GP or hospital specialist to be on his/her guard<sup>3</sup>. Most  
51  
52  
53  
54  
55  
56  
57  
58  
59  
60

1  
2  
3 hospital specialists, however, agreed that a hypothesis based on intuition must be followed by  
4  
5 analytical reasoning and thus substantiated by further investigations. GPs use gut feelings more  
6  
7 as a compass, steering them through uncertain and complex situations and busy office hours<sup>3</sup>.  
8  
9

10  
11  
12 Nevertheless, there is still much controversy about the use of intuition in the medical world  
13  
14<sup>22,23</sup>, even though current insights show that everybody uses a combination of intuitive and  
15  
16 analytical reasoning and that so-called 'skilled intuition' can be trusted<sup>24-26</sup>. In any case, young  
17  
18 doctors can be made aware of these current insights during their training. GPs are more  
19  
20 positive than specialists about the possibility of including intuition in medical education<sup>3</sup>.  
21  
22 Sharing the insights gained in the present study could help optimise the development of  
23  
24 intuitive reasoning processes in the training of residents.  
25  
26  
27  
28

29  
30 Self-reflection in the diagnostic phase, and quick and expert feedback from experienced  
31  
32 colleagues pertaining to intuitive reasoning processes can improve the quality of their training  
33  
34 and improve medical care<sup>27</sup>. Learning to optimise the interaction between intuitive and  
35  
36 analytical processes may be the best way to prevent diagnostic errors. This approach perfectly  
37  
38 matches the EBM concept, which is all about integrating the best available evidence, the  
39  
40 doctor's knowledge and experience and the patient's preferences<sup>28</sup>. Implementing intuition in  
41  
42 the training of residents is consistent with the educational point of view arguing for the  
43  
44 recognition of tacit knowledge and corresponding theories<sup>18</sup>. Lastly, accepting intuition as an  
45  
46 important and valuable part of diagnostic reasoning can help it gain more recognition.  
47  
48  
49  
50  
51  
52 Decisions made by Dutch medical disciplinary tribunals show that intuition is viewed by these  
53  
54  
55  
56  
57  
58  
59  
60

1  
2  
3 colleges as part of the professional standards for doctors<sup>29</sup>, underlining the importance of  
4  
5 gaining more recognition for intuition in medico-legal contexts.  
6  
7  
8  
9

10 A remarkable observation we made was that the terminology regarding intuitive processes  
11  
12 remains vague; different terms were being used as synonyms, and there were different  
13  
14 interpretations for the same words. Based on the results of similar research done among GPs<sup>30</sup>,  
15  
16 a Delphi procedure among hospital specialists could lead to a more precise and valid  
17  
18 description of intuitive processes in a hospital setting. This will increase the feasibility of  
19  
20 implementing intuition in residency training and start future additional research. Although a  
21  
22 precise definition of intuitive processes in hospital settings is lacking upon till now, ignoring the  
23  
24 outcome of these processes in stead of integrating them in diagnostic reasoning might be a  
25  
26 more important problem. In conclusion, intuitive knowledge plays an undeniable part in  
27  
28 diagnostic reasoning of physicians, evidently also in hospitals settings. A better understanding  
29  
30 of how to take advantage of intuition, while avoiding pitfalls, and how to develop 'skilled'  
31  
32 intuition, may improve the quality of hospital specialists' diagnostic reasoning.  
33  
34  
35  
36  
37  
38  
39  
40  
41  
42  
43  
44

45 *Acknowledgments:* Our thanks go out to all participants of the focus groups, to the moderators  
46  
47 Ina Brouwer and Jessica Fraeyman, to medical undergraduate students Janieke Stoeten, Sofie  
48  
49 de Groen, and Anne Schuurman.  
50

51  
52 *Ethical approval:* No ethical review was required for this study because no patients were  
53  
54 involved, and the hospital specialists were only asked about their opinions and perceptions.  
55  
56  
57  
58  
59  
60

### Authorship

All authors contributed substantially to the study.

- N. van den Brink: collecting of the data, analysis, drafting the manuscript, final approval.
- B. Holbrechts: collecting of the data, analysis, drafting the manuscript, final approval.
- P. Brand: collecting of the data, analysis, drafting the manuscript, final approval.
- C.F. Stolper: conducting the study design, collecting of the data, analysis, drafting the manuscript, final approval.
- P. Van Royen: conducting the study design, analysis, drafting the manuscript, final approval.

DATA SHARING STATEMENT: all data –the 6 transcripts, the code book, the results of the thematic analysis- are available for sharing via the corresponding author.

### Tables

Table 1 – Topic guide

|                                                                      |
|----------------------------------------------------------------------|
| Description of NAR, and more specifically intuition and gut feelings |
| Interaction between intuition and analytical processes               |
| Balance between intuition and analytical processes                   |
| Triggers of intuition                                                |
| Relying on intuition                                                 |
| Determining factors of intuition                                     |
| Differences between specialties                                      |

Table 2 - Participant specifications

|   | Date       | Location | Participants    |                                                                                                                                       |
|---|------------|----------|-----------------|---------------------------------------------------------------------------------------------------------------------------------------|
| 1 | 2013-11-28 | NL       | 6<br>♂:1<br>♀:5 | Internal medicine, paediatrics, cardiology, neurology, emergency medicine, pulmonology                                                |
| 2 | 2014-01-29 | NL       | 8<br>♂:2<br>♀:6 | Cardiology, endocrinology, gastro-enterology and hepatology, general surgery, infectious diseases, neurology, paediatrics, psychiatry |
| 3 | 2014-06-23 | NL       | 3<br>♂:2<br>♀:1 | Dermatology, nephrology, neurology                                                                                                    |
| 4 | 2015-03-16 | BE       | 5<br>♂:3<br>♀:2 | Abdominal surgery, emergency medicine, neurology, neurosurgery, paediatrics                                                           |
| 5 | 2015-10-22 | BE       | 4<br>♂:2<br>♀:2 | Hepatobiliary, transplantation and endocrine surgery, neurosurgery, psychiatry, sexology                                              |
| 6 | 2015-12-15 | BE       | 2<br>♂:2<br>♀:0 | Emergency medicine                                                                                                                    |

Table 3 Quotes

|                       | Focus group | Quote                                                                                                                                                                                                                         |
|-----------------------|-------------|-------------------------------------------------------------------------------------------------------------------------------------------------------------------------------------------------------------------------------|
| Description intuition |             |                                                                                                                                                                                                                               |
| 1.1                   | NL 2        | We all have this, if we first meet a patient, those first couple of seconds that you see somebody, you get a feeling of whether the situation is serious or not, alarming or not.                                             |
| 1.2                   | NL 2        | Yes, when you mention intuitive thinking I obviously immediately think about my professional domain and about gut feeling.                                                                                                    |
| 1.3                   | NL 3        | For me the word intuition is more...erm... something that doesn't rely on knowledge or experience, but more a sort of feeling, and to me what you're referring to, and what I mean, is not a feeling but pattern recognition. |
| Relying on intuition  |             |                                                                                                                                                                                                                               |
| 2.1                   | NL 1        | Well, at a certain moment you feel this is what it is, more or less, and that's a feeling I have very strongly with patients and // at the hospital I rely on my feelings... well... for about 80%.                           |
| 2.2                   | BE 3        | I also distrust it. I do use it, but I also distrust it, right?                                                                                                                                                               |
| 2.3                   | NL 3        | Some of us in the group are very allergic to the word gut feelings.                                                                                                                                                           |

|                                                  |      |                                                                                                                                                                                                                                                                                                                                                                                                                                |
|--------------------------------------------------|------|--------------------------------------------------------------------------------------------------------------------------------------------------------------------------------------------------------------------------------------------------------------------------------------------------------------------------------------------------------------------------------------------------------------------------------|
|                                                  |      | They think that as a doctor you can't use that term. But at the same time, I think that everyone knows that it does exist.                                                                                                                                                                                                                                                                                                     |
| 2.4                                              | BE 2 | It offers a certain advantage I think. You argue more correctly if you also use that intuition.                                                                                                                                                                                                                                                                                                                                |
| 2.5                                              | NL 2 | Yes, I don't experience a discrepancy either between the initial gut feeling, or whatever you want to call it, and what comes out in the end.                                                                                                                                                                                                                                                                                  |
| 2.6                                              | BE 2 | I actually agree with what you say about the initial thought being biased, that gut feeling, by what you know before the patient enters, by what you saw in C2M [electronic medical record], by what the secretary has said when introducing the patient, by what you might have heard from the GP on the phone. So, you often get a biased picture.                                                                           |
| 2.7                                              | BE 2 | Then you tell yourself I can skip that clinical examination, because last time nothing came out.                                                                                                                                                                                                                                                                                                                               |
| Intuition in the process of diagnostic reasoning |      |                                                                                                                                                                                                                                                                                                                                                                                                                                |
| - Presentation of intuition                      |      |                                                                                                                                                                                                                                                                                                                                                                                                                                |
| 3.1                                              | BE 2 | Even if you just hear a story from an assistant // Then the first thing is that there is something in in your guts, something that says this is alarming or reassuring. And then you listen very critically, to the whole story... By also building up a systemic picture.                                                                                                                                                     |
| - Triggers of intuition                          |      |                                                                                                                                                                                                                                                                                                                                                                                                                                |
| 3.2                                              | BE 2 | But well, observations are always partly intuitive, aren't they? You first look at what is going on with the person in front of you. What he's saying. I think it's like that in all specialities. You don't immediately work systematically.                                                                                                                                                                                  |
| 3.3                                              | BE 1 | There's a lot more involved then. What does the patient look like? At that moment it's a kind of multisensory experience. What does the patient look like? How is his breathing, and you listen to that for a while. Yes, there's a lot more to it than listening to their story on the phone. On the phone, it's purely factual, based on a number of questions. If you can actually see the patient, it's totally different. |
| - Intuition provides guidance                    |      |                                                                                                                                                                                                                                                                                                                                                                                                                                |
| 3.4                                              | NL 2 | But the intuition helps you, gives you guidance.                                                                                                                                                                                                                                                                                                                                                                               |
| 3.5                                              | NL 1 | That's how I've spared a hundred children some complicated investigation.                                                                                                                                                                                                                                                                                                                                                      |

|                                                   |      |                                                                                                                                                                                                                                                                                                                                                                                                                   |
|---------------------------------------------------|------|-------------------------------------------------------------------------------------------------------------------------------------------------------------------------------------------------------------------------------------------------------------------------------------------------------------------------------------------------------------------------------------------------------------------|
| - NAR is followed by AR                           |      |                                                                                                                                                                                                                                                                                                                                                                                                                   |
| 3.6                                               | BE 3 | I often find it an important tool at the start, but it's never going to be the only factor in the eventual conclusion and the eventual decision on the diagnosis and therapy for the patient.                                                                                                                                                                                                                     |
| - Interaction and balance between NAR and AR      |      |                                                                                                                                                                                                                                                                                                                                                                                                                   |
| 3.7                                               | BE 2 | You have to find the balance between intuition and systematic approach.                                                                                                                                                                                                                                                                                                                                           |
| 3.8                                               | BE 3 | I think it's obvious that at busy moments, simply because there's no other option, you sometimes have to rely on gut feelings. Even if it's only because you don't have time for analytical reasoning.                                                                                                                                                                                                            |
| 3.9                                               | BE 3 | But I'm convinced that experienced emergency specialists regularly rely on their gut feelings, to make a quick first assessment of the degree of urgency. Maybe even more than in other disciplines.                                                                                                                                                                                                              |
| Determinants of intuition                         |      |                                                                                                                                                                                                                                                                                                                                                                                                                   |
| 4.1                                               | NL 2 | Because intuition is made up of experience and knowledge.                                                                                                                                                                                                                                                                                                                                                         |
| 4.2                                               | BE 2 | I think some doctors who are less able to rely on that experience, on that intuition, they have to fall back on systematics. And so as you gain more experience, you can let go of that to some extent.                                                                                                                                                                                                           |
| Differences and similarities between specialities |      |                                                                                                                                                                                                                                                                                                                                                                                                                   |
| 5.1                                               | NL 1 | I always think, cardiology is of course a very different discipline, because we have, I believe, something like ten illness scripts, yes and I just check them all. Could it be this, or that? And we can actually image everything, so we can often figure it out.                                                                                                                                               |
| 5.2                                               | BE 2 | Subjectivity plays an important part, so you automatically start to make more use of the intuitive. ( <i>a psychiatrist</i> )                                                                                                                                                                                                                                                                                     |
| 5.3                                               | BE 3 | No, but general practitioners also need to deal with a different form of uncertainty, and are not held to account for that, the way it happens at a hospital. GPs are able to work with uncertainties. And that's a lot more difficult for a hospital doctor.                                                                                                                                                     |
| 5.4                                               | BE 3 | A necessary condition for using intuition is, for example, empathy. So the better you're able to understand what the patient means or feels, the better of course you can assess the situation // There are people who are simply purely scientifically oriented and have no empathic ability. Those are people who are less likely to develop this kind of intuition, or they develop it in a less valuable way. |



| Defensive medicine |      |                                                                                                                                                                                                                                                                                                                                                                    |
|--------------------|------|--------------------------------------------------------------------------------------------------------------------------------------------------------------------------------------------------------------------------------------------------------------------------------------------------------------------------------------------------------------------|
| 6.1                | BE 2 | That [I've made this decision based on my intuition] is not something you can say before a court, right?                                                                                                                                                                                                                                                           |
| 6.2                | BE 3 | And of course in situations where you don't yet have the experience, you'll need to rely on the evidence to some extent, and after you have gained the experience, you still have to keep looking at the evidence from the literature, and maintain a balance between the two.                                                                                     |
| Medical education  |      |                                                                                                                                                                                                                                                                                                                                                                    |
| 7.1                | NL1  | Yes, that's exactly when you have to check, I think always, or occasionally, why do I get this feeling, right? And that's what's so good about a hospital like this, that there is a trainee doctor sitting beside you. And when you tell them it's this or that, you need to explain why you get that feeling.                                                    |
| 7.2.               | BE 1 | It should encourage you to recognize that feeling that arises and then to think right, I need to do something about this, in the sense of further reflection or especially thinking why do I get this feeling with this particular patient? // In my case, that often induces me to broaden my scope or to discuss it with someone else or consult another book... |
| 7.3                | BE 2 | When trainees see patients they get feedback on their findings. I think that's very important. Also with regard to this intuitive thinking. But I think, erm, what you could also do in their training. is emphasise its value more.                                                                                                                               |

## References

1. Kahneman D. A perspective on judgment and choice: mapping bounded rationality. *The Am Psychol.* 2003;58(9):697-720.
2. Monteiro S, Norman G, Sherbino J. The 3 faces of clinical reasoning: Epistemological explorations of disparate error reduction strategies. *J Eval Clin Pract.* 2018;24(3):666-673.
3. Stolper E, van Bokhoven M, Houben P, et al. The diagnostic role of gut feelings in general practice. A focus group study of the concept and its determinants. *BMC Fam Pract.* 2009;10:17.
4. Van den Bruel A, Aertgeerts B, Bruyninckx R, Aerts M, Buntinx F. Signs and symptoms for diagnosis of serious infections in children: a prospective study in primary care. *Br J Gen Pract.* 2007;57(540):538-546.
5. Chilcote DR. Intuition: A Concept Analysis. *Nursing Forum.* 2017;52(1):62-67.

- 1
  - 2
  - 3
  - 4
  - 5
  - 6
  - 7
  - 8
  - 9
  - 10
  - 11
  - 12
  - 13
  - 14
  - 15
  - 16
  - 17
  - 18
  - 19
  - 20
  - 21
  - 22
  - 23
  - 24
  - 25
  - 26
  - 27
  - 28
  - 29
  - 30
  - 31
  - 32
  - 33
  - 34
  - 35
  - 36
  - 37
  - 38
  - 39
  - 40
  - 41
  - 42
  - 43
  - 44
  - 45
  - 46
  - 47
  - 48
  - 49
  - 50
  - 51
  - 52
  - 53
  - 54
  - 55
  - 56
  - 57
  - 58
  - 59
  - 60
6. Melin-Johansson C, Palmqvist R, Ronnberg L. Clinical intuition in the nursing process and decision-making - A mixed studies review. *J Clin Nurs*. 2017.
  7. Richards K. Intuition: A Powerful Self-Care Tool for a Life that Thrives. *Nursing Economics*. 2015;33(5):285-287.
  8. Wiswell J, Tsao K, Bellolio MF, Hess EP, Cabrera D. "Sick" or "not-sick": accuracy of System 1 diagnostic reasoning for the prediction of disposition and acuity in patients presenting to an academic ED. *Am J Emerg Med*. 2013;31(10):1448-1452.
  9. Calder LA, Forster AJ, Stiell IG, et al. Experiential and rational decision making: a survey to determine how emergency physicians make clinical decisions. *Emerg Med J* 2012;29(10):811-816.
  10. Mamede S, Schmidt HG, Rikers RM, Penaforte JC, Coelho-Filho JM. Breaking down automaticity: case ambiguity and the shift to reflective approaches in clinical reasoning. *Med Educ*. 2007;41(12):1185-1192.
  11. Sibbald M, Sherbino J, Preyra I, Coffin-Simpson T, Norman G, Monteiro S. Eyeballing: the use of visual appearance to diagnose 'sick'. *Med Educ*. 2017;51(11):1138-1145.
  12. Pelaccia T, Tardif J, Tribby E, Charlin B. An analysis of clinical reasoning through a recent and comprehensive approach: the dual-process theory. *Med Educ Online*. 2011;16.
  13. Stolper CF, Van de Wiel M, Van Royen P, Van Bokhoven MA, Van der Weijden T, Dinant GJ. Gut feelings as a third track in general practitioners' diagnostic reasoning. *J Gen Intern Med*. 2011;26(2):197-203.
  14. Norman GR, Monteiro SD, Sherbino J, Ilgen JS, Schmidt HG, Mamede S. The Causes of Errors in Clinical Reasoning: Cognitive Biases, Knowledge Deficits, and Dual Process Thinking. *Acad Med*. 2017;92(1)23-30.
  15. Pope C, van Royen P, Baker R. Qualitative methods in research on healthcare quality. *Quality & Safety in Health Care*. 2002;11(2):148-152.
  16. Pope C, Ziebland S, Mays N. Qual Research in Health Care. Analysing qualitative data. *BMJ (Clinical research ed.)*. 2000;320(7227):114-116.
  17. Kitzinger J. Qualitative research. Introducing focus groups. *BMJ (Clinical research ed.)*. 1995;311(7000):299-302.
  18. Van Droogenbroeck S. Een filosofie van stille kennis in de interne geneeskunde: Etnografische studie over onzekerheid, ervaringskennis en evidence-based medicine in het diagnostisch proces. Brussel: ASP / VUBPRESS; 2015.
  19. Anderson JR. ACT: a simple theory of complex cognition. *Am Psychol*. 1996;51(4).
  20. Norman GR, Eva K, Brooks LR, Hamstra S. Expertise in Medicine and Surgery. In: Ericsson KA, Charness N, Feltovich PJ, Hoffman RR. *The Cambridge Handbook of Expertise and Expert Performance*. New York: Cambridge University Press; 2006.
  21. Isenman L. Understanding unconscious intelligence and intuition: "blink" and beyond. *Persp in Biol and Med*. 2013;56(1):148-166.
  22. Greenhalgh T. Intuition and evidence - uneasy bedfellows? *Br J Gen Pract*. 2002;52(478):395-400.
  23. Witteman CLM, Spaanjaars NL, Aarts AA. Clinical intuition in mental health care: A discussion and focus groups. *Counselling Psychology Quarterly*. 2012;25(1):19-29.
  24. Kahneman D FS. A Model of Heuristic Judgement. In: *The Cambridge Handbook of Thinking and Reasoning*. New York: Cambridge University Press; 2005.

- 1
- 2
- 3
- 4 **25.** Evans JS, Stanovich KE. Dual-Process Theories of Higher Cognition: Advancing the
- 5 Debate. *Perspectives on Psychological Science* : J Ass Psychol Science. 2013;8(3):223-
- 6 241.
- 7 **26.** Kahneman D, Klein G. Conditions for intuitive expertise: a failure to disagree. *The Am*
- 8 *Psychol.* 2009;64(6):515-526.
- 9 **27.** Mamede S, Schmidt HG. Reflection in Medical Diagnosis: A Literature Review. *Health*
- 10 *Professions Education.* 2017;3(1):15-25.
- 11 **28.** Sackett DL, Rosenberg WM, Gray JA, Haynes RB, Richardson WS. Evidence based
- 12 medicine: what it is and what it isn't. *BMJ.* 1996;312(7023):71-72.
- 13 **29.** Stolper E, Legemaate J, Dinant GJ. How do disciplinary tribunals evaluate the "gut
- 14 feelings" of doctors? An analysis of Dutch tribunal decisions, 2000-2008. *J Law and Med.*
- 15 *2010;18(1):68-75.*
- 16 **30.** Stolper E, Van Royen P, Van de Wiel M, et al. Consensus on gut feelings in general
- 17 practice. *BMC Fam Pract.* 2009;10:66.
- 18
- 19
- 20
- 21
- 22
- 23
- 24
- 25
- 26
- 27
- 28
- 29
- 30
- 31
- 32
- 33
- 34
- 35
- 36
- 37
- 38
- 39
- 40
- 41
- 42
- 43
- 44
- 45
- 46
- 47
- 48
- 49
- 50
- 51
- 52
- 53
- 54
- 55
- 56
- 57
- 58
- 59
- 60
